# Supplementary material for: Eco-Friendly Magnetic Nanocatalysts: Optimized Pyrrole Synthesis via Ternary FexCuyMzOk(M = Zn, Mn) Nanocomposites
Source: Research Square preprint supplement (doi:10.21203/rs.3.rs-8080529/v1), 2025-12-15
Supplement: Supplementary file 1 [file 864431aa48b6e34d3ddf649f.docx]

**Eco-Friendly Magnetic Nanocatalysts: Optimized Pyrrole Synthesis via Ternary FexCuyMzOk (M = Zn, Mn) Nanocomposites**

*Zahra Toozandehjania,Mostafa Gholizadeh*a,Ehsan Esmaeilnezhadb*

*aDepartment of Chemistry, Faculty of Science, Ferdowsi University of Mashhad, Mashhad, I.R.Iran*

*bDepartment of Petroleum Engineering,Hakim Sabzevari University ,Sabzevar.I.R.Iran*

**Corresponding Author: Mostafa Gholizadeh (E-mail :* [*m_gholizadeh@um.ac.ir*](mailto:m_gholizadeh@um.ac.ir)*)*

Content of Figure

[Fig. 1- EDX analysis of Fe3O4 (above) mapping analysis, (below) EDX spectrum 5](#_Toc199942038)

[Fig. 2- EDX analysis of FexCuyZnzOk (above) mapping analysis, (below) EDX spectrum 6](#_Toc199942039)

[Fig. 3-EDX analysis of FexCuyMnzOk (above) mapping analysis, (below) EDX spectrum 6](#_Toc199942040)

[Figure 4-1H NMR expand (300 MHz, CDCl3) compound (1a) 8](#_Toc199942041)

[Figure 5-1H NMR (300 MHz, CDCl3) of compound (1a) 8](#_Toc199942042)

[Figure 6-13C NMR (75 MHz, CDCl3) of compound (1a) 9](#_Toc199942043)

[Figure 7-1H NMR (300 MHz, CDCl3) of compound (1b) 9](#_Toc199942044)

[Figure 8-1H NMR expand (300 MHz, CDCl3) compound (1b) 10](#_Toc199942045)

[Figure 9-13C NMR (75 MHz, CDCl3) of compound (1b) 10](#_Toc199942046)

[Figure 10-1H NMR (300 MHz, CDCl3) of compound (1c) 11](#_Toc199942047)

[Figure 11-1H NMR expand (300 MHz, CDCl3) compound (1c) 11](#_Toc199942048)

[Figure 12-13C NMR (75 MHz, CDCl3) of compound (1c) 12](#_Toc199942049)

[Figure 13-1H NMR (300 MHz, CDCl3) of compound (1d) 12](#_Toc199942050)

[Figure 14-1H NMR expand (300 MHz, CDCl3) compound (1d) 13](#_Toc199942051)

[Figure 15-13C NMR (75 MHz, CDCl3) of compound (1d) 13](#_Toc199942052)

[Figure 16-1H NMR (300 MHz, CDCl3) of compound (1e) 14](#_Toc199942053)

[Figure 17-1H NMR expand (300 MHz, CDCl3) compound (1e) 14](#_Toc199942054)

[Figure 18-13C NMR (75 MHz, CDCl3) of compound (1e) 15](#_Toc199942055)

[Figure 19-1H NMR (300 MHz, CDCl3) of compound (1f) 15](#_Toc199942056)

[Figure 20-1H NMR expand (300 MHz, CDCl3) compound (1f) 16](#_Toc199942057)

[Figure 21-13C NMR (75 MHz, CDCl3) of compound (1f) 16](#_Toc199942058)

[Figure 22-1H NMR (300 MHz, CDCl3) of compound (1g) 17](#_Toc199942059)

[Figure 23-1H NMR expand (300 MHz, CDCl3) compound (1g) 17](#_Toc199942060)

[Figure 24-13C NMR (75 MHz, CDCl3) of compound (1g) 18](#_Toc199942061)

[Figure 25-1H NMR (300 MHz, CDCl3) of compound (1h) 18](#_Toc199942062)

[Figure 26-1H NMR expand (300 MHz, CDCl3) compound (1h) 19](#_Toc199942063)

[Figure 27-13C NMR (75 MHz, CDCl3) of compound (1h) 19](#_Toc199942064)

[Figure 28-1H NMR (300 MHz, CDCl3) of compound (1k) 20](#_Toc199942065)

[Figure 29-1H NMR expand (300 MHz, CDCl3) compound (1k) 20](#_Toc199942066)

[Figure 30-13C NMR (75 MHz, CDCl3) of compound (1k) 21](#_Toc199942067)

[Figure 31-1H NMR (300.13 MHz, CDCl3) intermediate C 21](#_Toc199942068)

[Figure 32-1H NMR expand (300.13 MHz, CDCl3) intermediate C 22](#_Toc199942069)

[Figure 33-13C NMR (75 MHz, CDCl3) intermediate C 22](#_Toc199942070)

**1.General Information**

All reagents and solvents utilized in this study were procured from commercial suppliers. The purity assessments of the products and reaction monitoring were conducted using TLC on silica gel polygram STL G/UV 254 plates and GC-FID (Agilent 6890, Santa Clara, USA) instrumentation. The melting points of the products were determined using an Electrothermal Type 9100 melting point apparatus. FT-IR spectra were obtained using an Avatar 370 FT-IR Therma Nicolet spectrometer. NMR spectra were acquired with Brucker Avance 300 and 400 MHz instruments in CDCl3 and DMSO, employing tetramethylsilane as the internal standard, and J values are reported in Hz. Mass spectra were recorded on a CH7A Varianmat Bremem instrument at 70 eV electron impact ionization, in m/z (rel%).

| 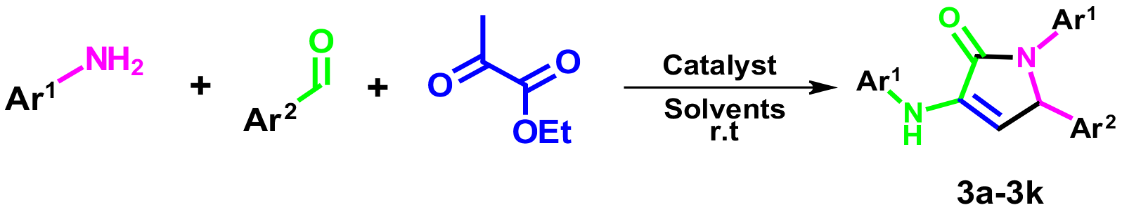 | | | | | |
| --- | --- | --- | --- | --- | --- |
| Product | **Ar1** | **Ar2** | **m.p (◦C) lit** | **m.p (◦C)** | **Yield (%)** |
| 1a | C6H5 | C6H5 | Ref 1  White solid | 219-220 | 84 |
| 1b | 4-CH3C6H3 | 3-pyridinyl | Ref 1  Cream powder | 188-189 | 80 |
| 1c | 4-Br C6H4 | 2-Cl C6H4 | Ref 3  White powder | 240-242 | 72 |
| 1d | 4-Br C6H4 | 4-Cl C6H4 | Ref 3  White cream powder | 191-193 | 88 |
| 1f | 3-Cl C6H4 | 2,4-CH3 C6H4 | Ref 4  Cream powder | 168-170 | 78 |
| 1e | 4-Br C6H4 | 4-CN C6H4 | Ref 2  Cream powder | 234-236 | 93 |
| 1g | 4-Cl C6H4 | 4-CN C6H4 | Ref 2  White powder | 232-234 | 91 |
| 1h | C6H5 | 3-NO2 C6H4 | Ref 1  Yellow powder | 213-214 | 81 |
| 1k | 4-Br C6H4 | 4-OMe C6H4 | Ref 1  Cream powder | 198-200 | 79 |

Table S- 4. Pyrrole derivatives using FexCuyZnzOk as a Catalyst

**2.Characterizations**

**2.1. EDX analysis**

Energy dispersive X-ray spectroscopy (EDX). EDX analysis reveals the elemental composition of Fe3O4, FexCuyZnzOk, and FexCuyMnzOk as prepared. As illustrated in Fig. 1 (a-d), the primary components of the Fe3O4 particles are iron (Fe), carbon (C) and oxygen (O), with weight percentages of 47.84%, 8.62% and 43.54%, respectively. Furthermore, the EDX analysis indicates that the core-shell catalyst predominantly consists of copper (Cu), zinc (Zn), manganese (Mn), iron (Fe), and oxygen (O) in varying proportions. No additional elements were detected, confirming the successful synthesis and purity of the catalyst.

*Table S- 5 – EDX analysis*

| Nanocomposites | Fe (W%) | O (W%) | C (W%) | Cu (W%) | Zn (W%) | Mn (W%) |
| --- | --- | --- | --- | --- | --- | --- |
| Fe3O4 | 47.84 | 43.54 | 8.62 | _____ | _____ | _____ |
| FexCuyZnzOk | 36.00 | 40.66 | 17.48 | 4.77 | 1.09 | _____ |
| FexCuyMnzOk | 37.95 | 40.03 | 17.12 | 3.88 | _____ | 1.02 |


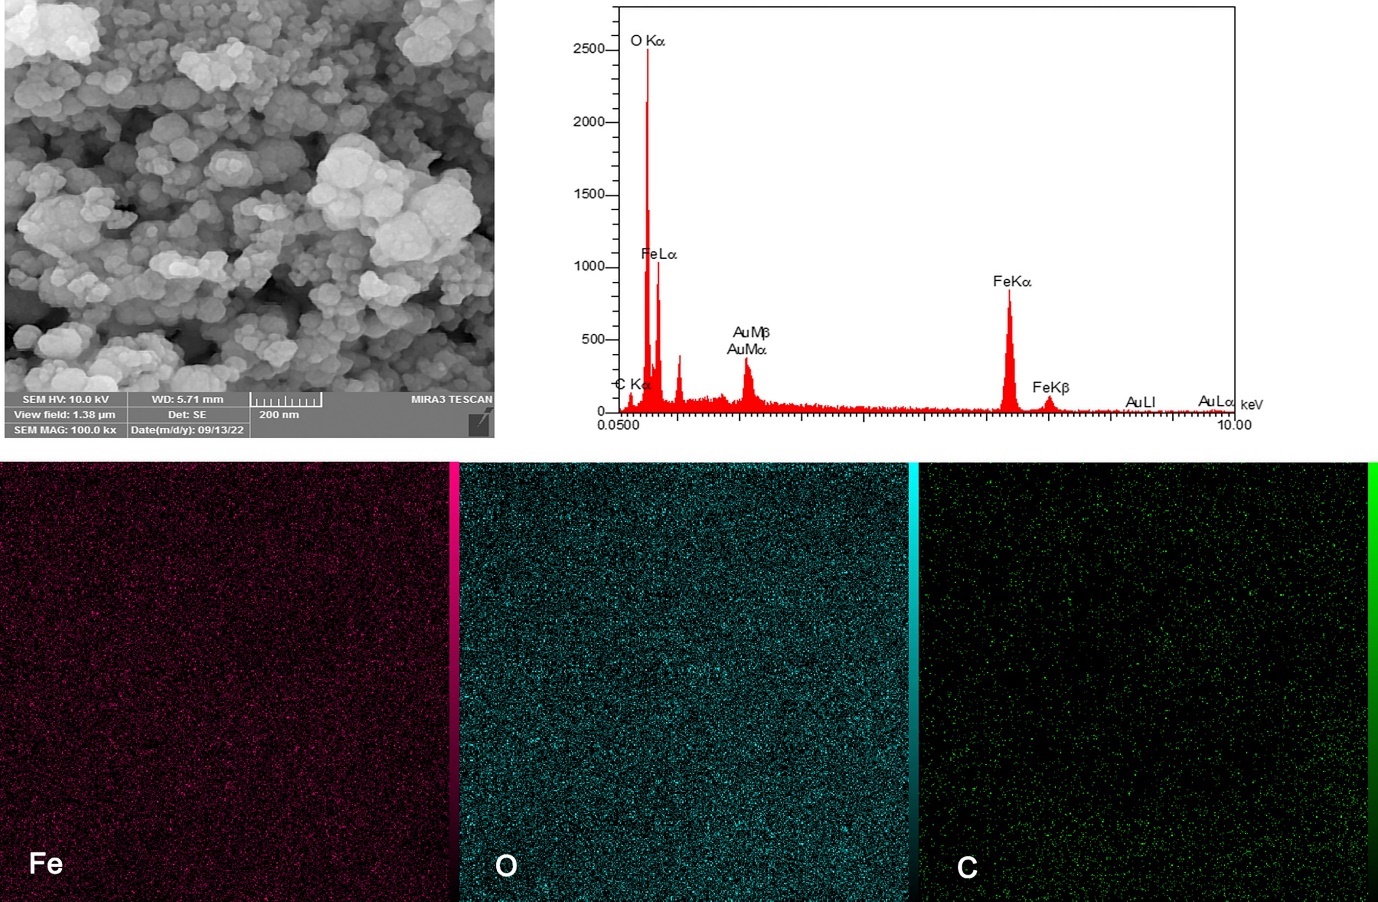


Fig. S- 1. EDX analysis of Fe3O4 (above) mapping analyis, (below) EDX spectrum


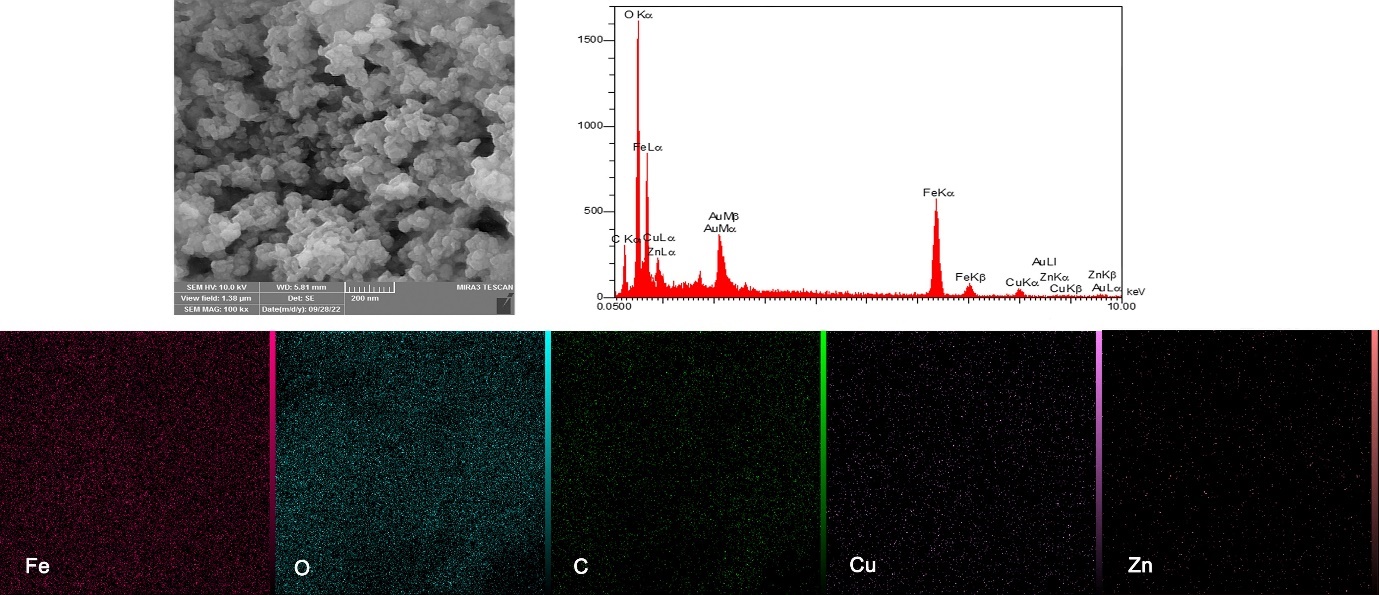


Fig.S- 2. EDX analysis of FexCuyZnzOk (above) mapping analyis, (below) EDX spectrum


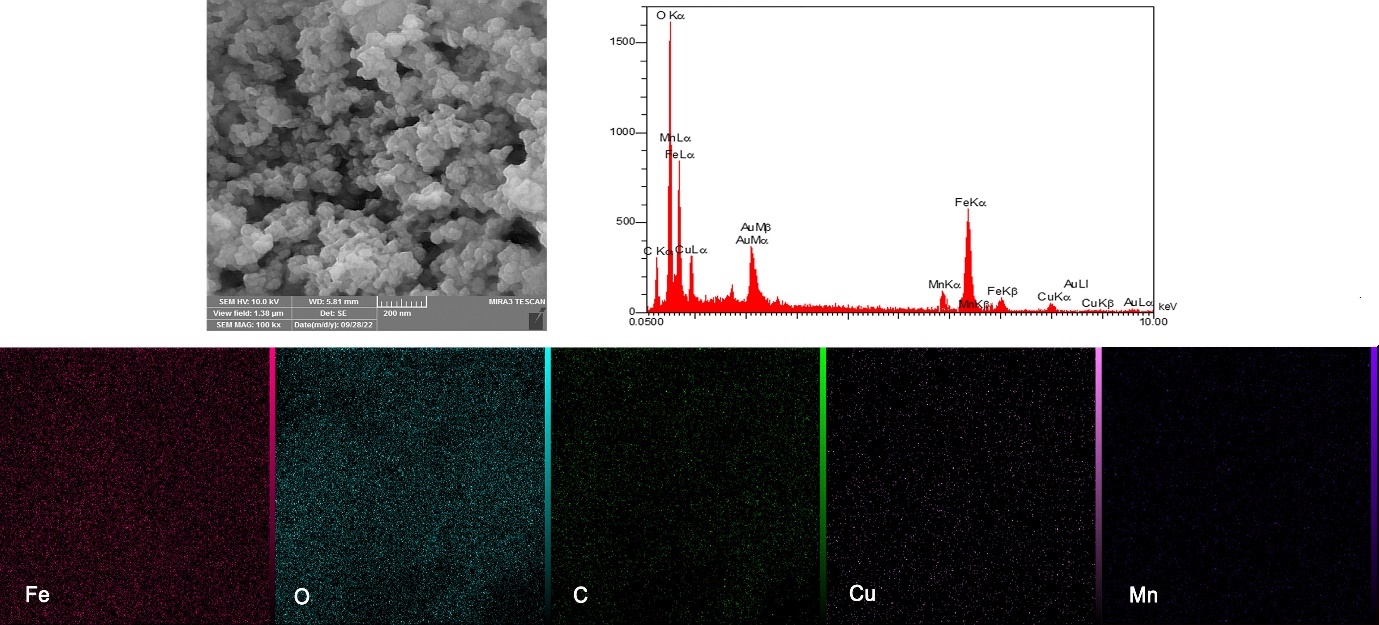


Fig.S- 3. EDX analysis of FexCuyMnzOk (above) mapping analyis, (below) EDX spectrum

**2.2. NMR**

***1a.1,5-diphenyl-3-(phenylamino)-1,5-dihydro-2H-pyrrol-2-one*** (84%) 1H NMR (300 MHz, CDCl3) δ [ppm] 7.54 (d, *J* = 7.7 Hz, 2H), 7.43 – 7.27 (m, 10H), 7.23 (d, *J* = 4.6 Hz, 2H), 7.14 – 7.06 (m, 1H), 6.86 – 6.79 (m, 1H), 6.64 (d, *J* = 5.1 Hz, 1H), 5.45 (d, *J* = 4.5 Hz, 1H). 13C NMR (75 MHz, CDCl3) δ [ppm] 163.26, 141.02, 139.99, 139.93, 134.30, 129.64, 129.27, 129.25, 128.87, 127.90, 126.25, 123.92, 123.60, 121.48, 113.03, 66.77.

***1b.*** ***5-(pyridin-3-yl)-1-(p-tolyl)-3-(p-tolylamino)-1,5-dihydro-2H-pyrrol-2-one.***

(80%) 1H NMR (300 MHz, CDCl3) δ [ppm] 8.57 (d, *J* = 3.5 Hz, 1H), 8.52 – 8.47 (m, 1H), 7.75 (s, 2H), 7.34 (dd, *J* = 8.1, 4.7 Hz, 1H), 7.32 – 7.26 (m, 2H), 7.19 (dd, *J* = 20.0, 6.5 Hz, 3H), 7.10 (d, *J* = 9.0 Hz, 2H), 7.03 – 6.97 (m, 2H), 5.49 (d, *J* = 6.0 Hz, 1H), 2.35 (s, 6H). 13C NMR (75 MHz, CDCl3) δ [ppm] 163.05, 150.87, 148.31, 138.48, 138.17, 135.97, 134.60, 134.41, 133.05, 132.18, 130.01, 129.83, 125.14, 122.93, 122.74, 113.10, 66.40, 20.73, 20.70.

***1c.1-(4-bromophenyl)-3-((4-bromophenyl) amino)-5-(2-chlorophenyl)-1,5-dihydro-2H-pyrrol-2-one.***

(72%) 1H NMR (300 MHz, CDCl3) δ [ppm] 7.90 (s, 1H), 7.51 – 7.35 (m, 8H), 7.35 – 7.26 (m, 3H), 7.26 (d, *J* = 2.9 Hz, 1H), 6.28 (d, *J* = 5.1 Hz, 1H), 5.46 (d, *J* = 5.3 Hz, 1H). 13C NMR (75 MHz, CDCl3) δ [ppm] 162.86, 139.06, 138.60, 136.05, 134.41, 134.38, 132.23, 131.90, 130.75, 130.58, 129.62, 128.15, 125.47, 124.64, 119.40, 118.11, 117.35, 65.43.

***1d.1-(4-bromophenyl)-3-((4-bromophenyl) amino)-5-(4-chlorophenyl)-1,5-dihydro-2H-pyrrol-2-one.***

(88%) 1H NMR (300 MHz, CDCl3) δ [ppm] 7.75 (s, 1H), 7.50 – 7.44 (m, 4H), 7.41 – 7.35 (m, 2H), 7.30 – 7.24 (m, 6H), 6.64 (d, *J* = 5.1 Hz, 1H), 5.47 (d, *J* = 5.1 Hz, 1H). 13C NMR (75 MHz, CDCl3) δ [ppm] 163.22, 139.05, 139.02, 138.08, 134.25, 132.23, 131.90, 130.17, 129.56, 125.45, 124.64, 119.40, 117.35, 113.10, 66.47.

***1e.*** ***1-(3-chlorophenyl)-3-((3-chlorophenyl) amino)-5-(2,4-dimethylphenyl)-1,5-dihydro-2H-pyrrol-2-one.***

(78%) 1H NMR (300 MHz, CDCl3) δ [ppm] 7.82 (s, 1H), 7.53 (d, *J* = 4.3 Hz, 1H), 7.49 – 7.43 (m, 1H), 7.24 – 7.11 (m, 4H), 7.03 – 6.94 (m, 3H), 6.86 – 6.80 (m, 1H), 6.64 (d, *J* = 5.1 Hz, 1H), 5.48 (d, *J* = 4.6 Hz, 1H), 2.30 (s, 3H), 2.19 (s, 3H). 13C NMR (75 MHz, CDCl3) δ [ppm] 162.49, 141.52, 140.66, 138.29, 136.78, 136.03, 135.07, 134.39, 134.25, 131.42, 130.31, 129.99, 128.78, 127.68, 123.69, 123.61, 122.56, 121.89, 121.75, 121.05, 117.80, 65.86, 20.92, 19.92.

***1f.4-(1-(4-bromophenyl)-4-((4-bromophenyl) amino)-5-oxo-2,5-dihydro-1H-pyrrol-2yl) benzonitrile***.

(93%) 1H NMR (300 MHz, CDCl3) δ [ppm] 7.75 (s, 1H), 7.67 – 7.61 (m, 2H), 7.51 – 7.44 (m, 6H), 7.38 (d, *J* = 7.2 Hz, 2H), 6.64 (d, *J* = 5.1 Hz, 1H), 5.47 (d, *J* = 5.3 Hz, 1H). 13C NMR (75 MHz, CDCl3) δ [ppm] 163.22, 141.51, 139.05, 139.02, 134.25, 133.18, 132.23, 131.90, 129.38, 125.45, 124.64, 119.40, 118.10, 117.35, 113.11, 111.41, 67.33.

***1g.4-(1-(4-chlorophenyl)-4-((4-chlorophenyl) amino)-5-oxo-2,5-dihydro-1H-pyrrol-2yl) benzonitrile.***

(91%) 1H NMR (300 MHz, CDCl3) δ [ppm] 7.74 (s, 1H), 7.67 – 7.61 (m, 2H), 7.51 – 7.42 (m, 4H), 7.29 (d, *J* = 11.3 Hz, 4H), 7.05 (d, *J* = 6.7 Hz, 2H), 6.64 (d, *J* = 5.1 Hz, 1H), 5.47 (d, *J* = 4.3 Hz, 1H). 13C NMR (75 MHz, CDCl3) δ [ppm] 163.33, 141.51, 139.03, 138.55, 134.25, 134.22, 133.18, 129.58, 129.49, 129.38, 128.01, 125.05, 124.52, 118.10, 113.11, 111.41, 67.34.

***1h. 5-(3-nitrophenyl)-1-phenyl-3-(phenylamino)-1,5-dihydro-2H-pyrrol-2-one.*** (81%) 1H NMR (300 MHz, CDCl3) δ [ppm] 8.19 (d, *J* = 2.0 Hz, 1H), 8.12 – 8.06 (m, 1H), 7.68 – 7.62 (m, 1H), 7.53 (d, *J* = 16.4 Hz, 3H), 7.37 – 7.27 (m, 4H), 7.26 – 7.20 (m, 2H), 7.14 – 7.06 (m, 1H), 6.86 – 6.79 (m, 1H), 6.65 (d, *J* = 5.1 Hz, 1H), 5.55 (d, *J* = 0.8 Hz, 1H).13C NMR (75 MHz, CDCl3) δ 163.33, 148.74, 141.02, 140.09, 139.04, 134.75, 134.33, 130.71, 129.63, 129.27, 126.25, 124.37, 123.92, 123.60, 123.20, 121.48, 113.06, 66.40.

***1k.1-(4-bromophenyl)-3-((4-bromophenyl) amino)-5-(4-methoxyphenyl)-1,5-dihydro-2H-pyrrol-2-one.***

(79%) 1H NMR (300 MHz, CDCl3) δ [ppm] 7.75 (s, 1H), 7.48 (dd, *J* = 8.7, 3.3 Hz, 4H), 7.41 – 7.35 (m, 2H), 7.27 (d, *J* = 6.8 Hz, 2H), 7.13 – 7.07 (m, 2H), 6.92 (d, *J* = 6.7 Hz, 2H), 6.64 (d, *J* = 4.9 Hz, 1H), 5.45 (d, *J* = 4.3 Hz, 1H), 3.80 (s, 3H). 13C NMR (75 MHz, CDCl3) δ [ppm] 163.22, 159.51, 139.05, 138.95, 134.25, 133.76, 132.23, 131.90, 129.54, 125.45, 124.64, 119.40, 117.35, 114.56, 113.09, 66.74, 55.35.


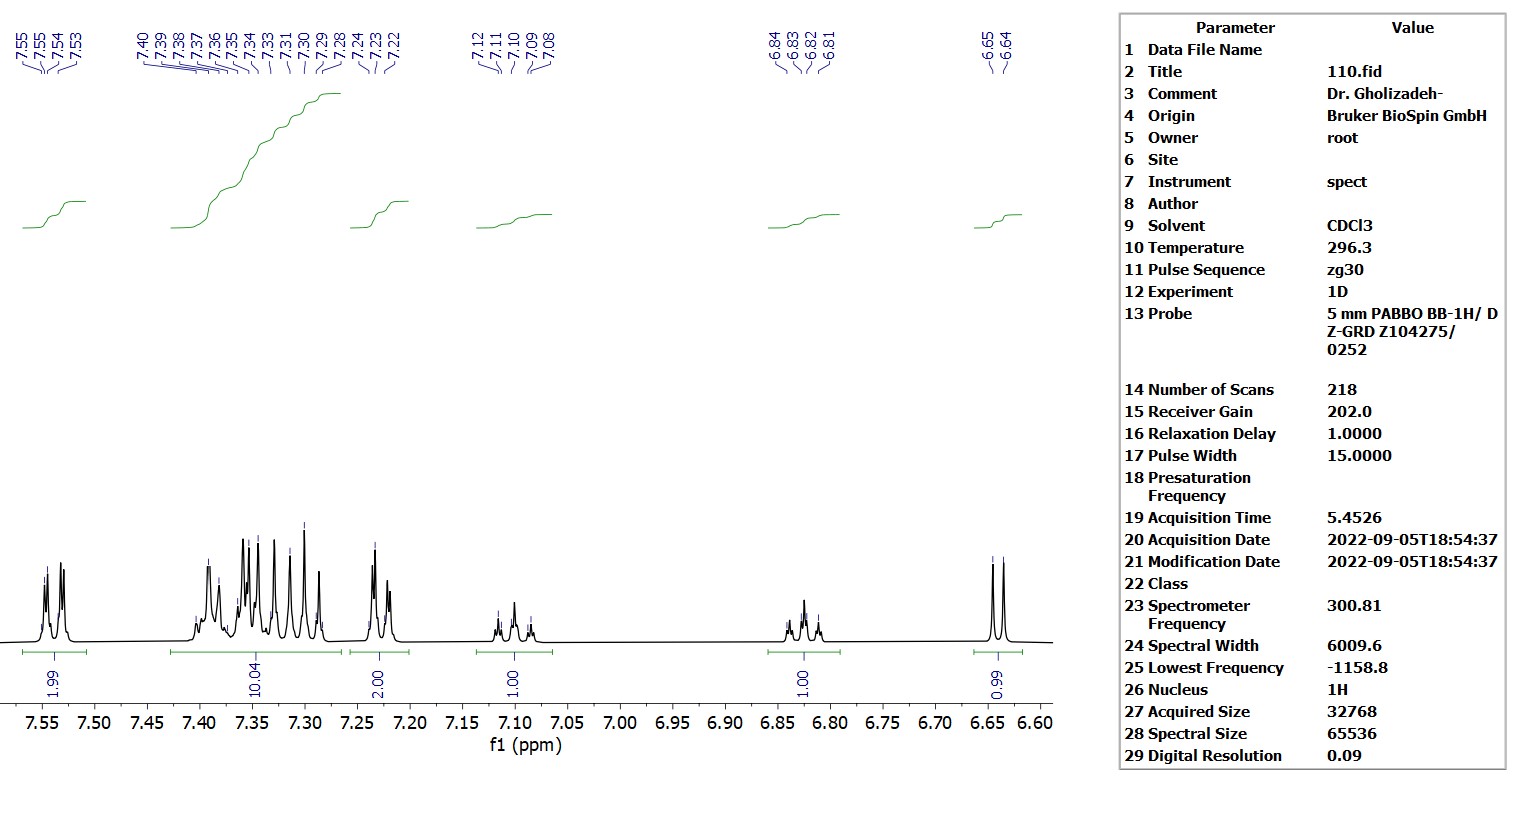

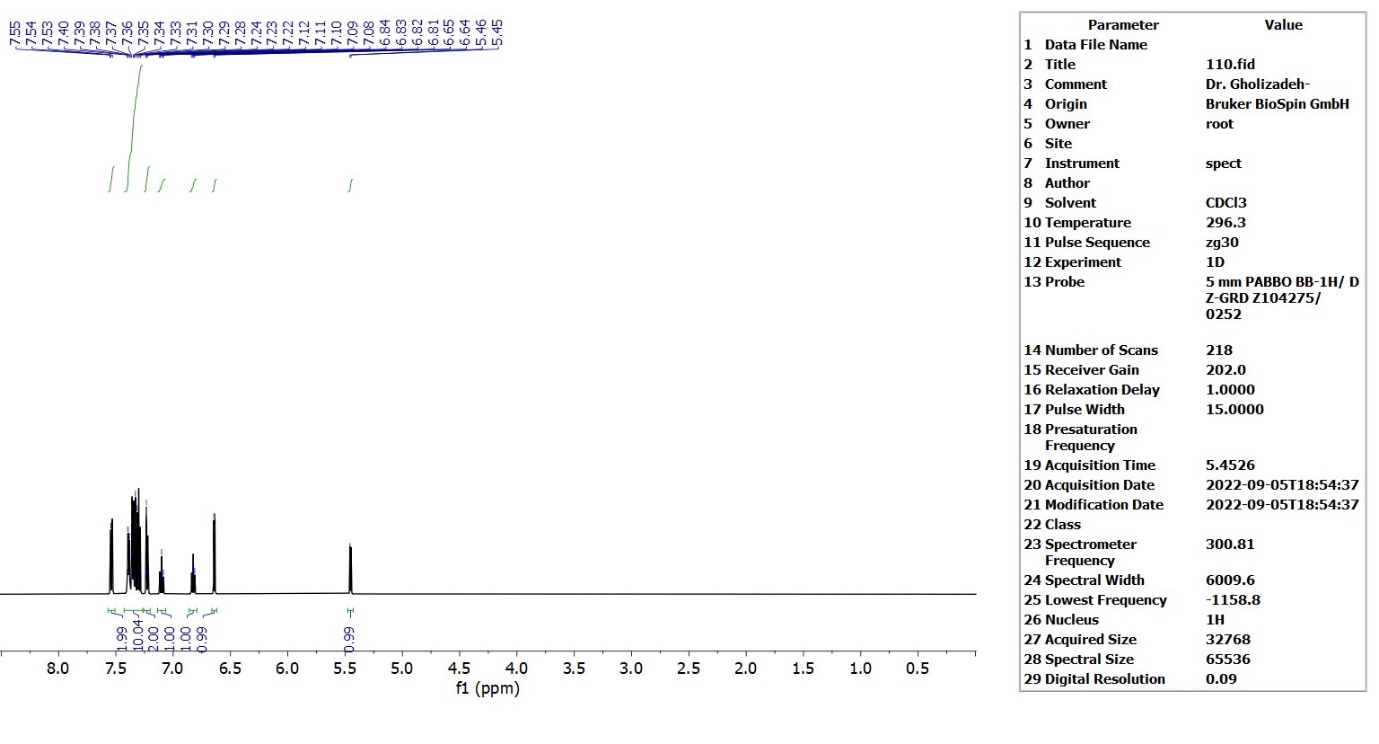


Figure 4-1H NMR expand (300 MHz, CDCl3) compound (1a)

Figure 5-1H NMR (300 MHz, CDCl3) of compound (1a)


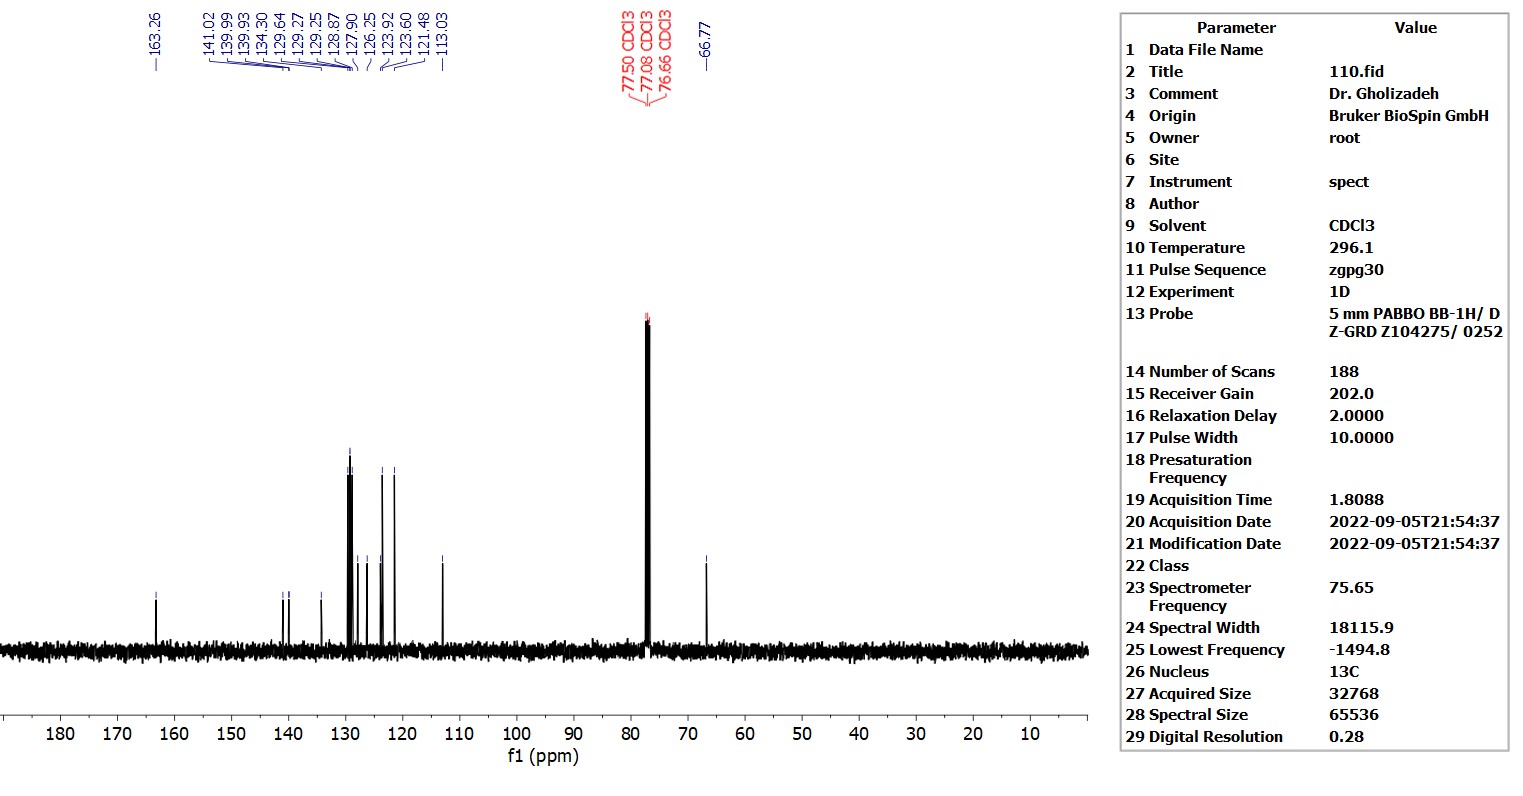


Figure 6-13C NMR (75 MHz, CDCl3) of compound (1a)


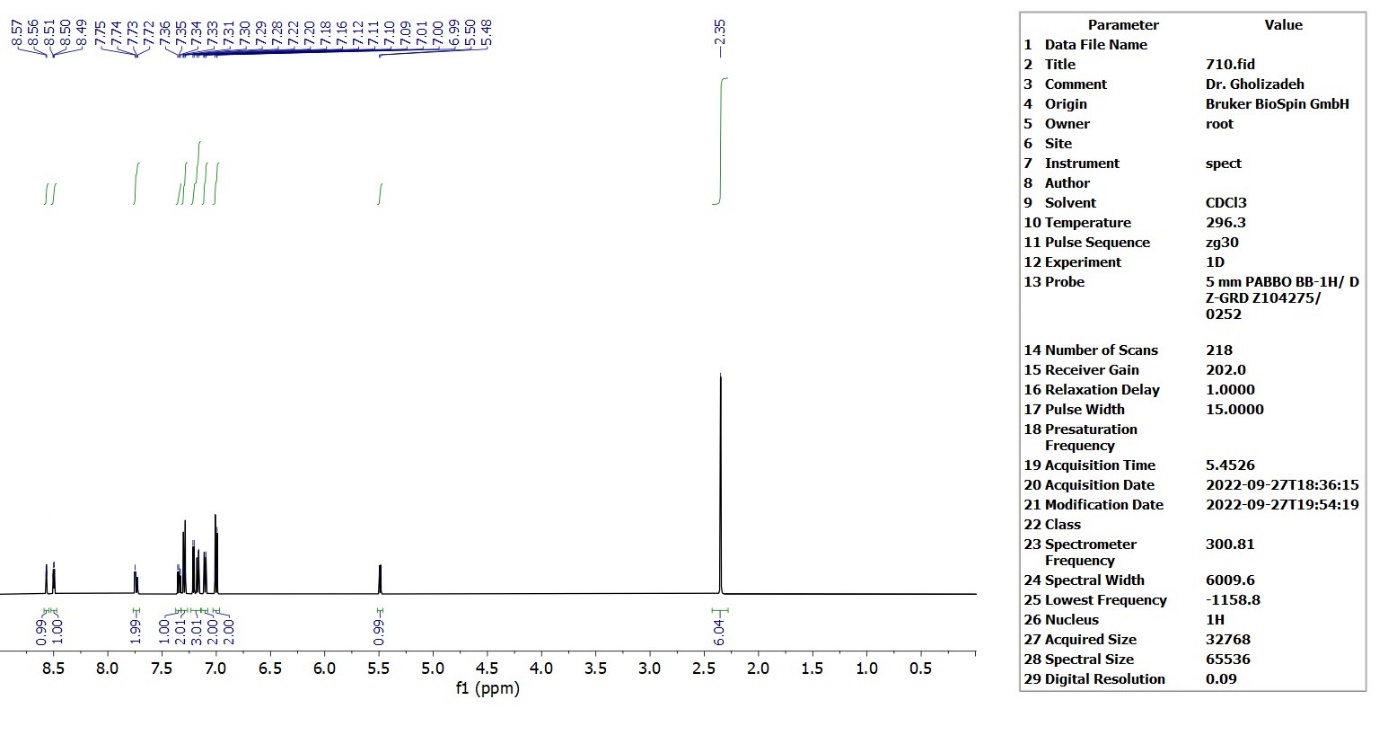


Figure 7-1H NMR (300 MHz, CDCl3) of compound (1b)


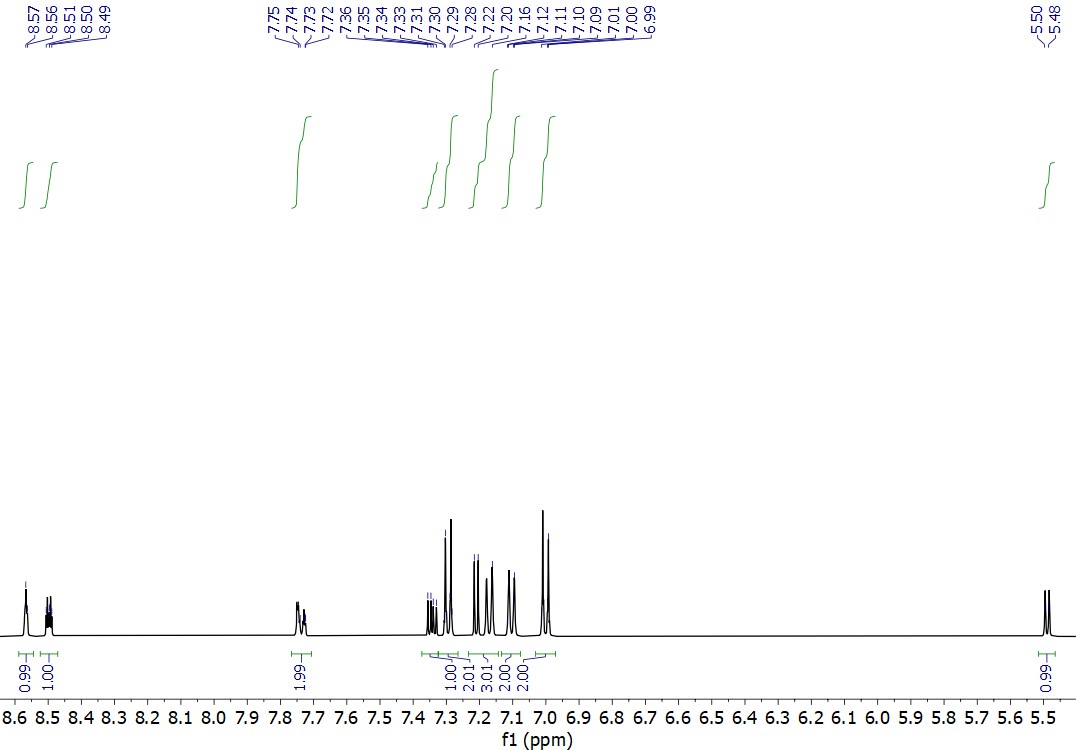


Figure 8-1H NMR expand (300 MHz, CDCl3) compound (1b)


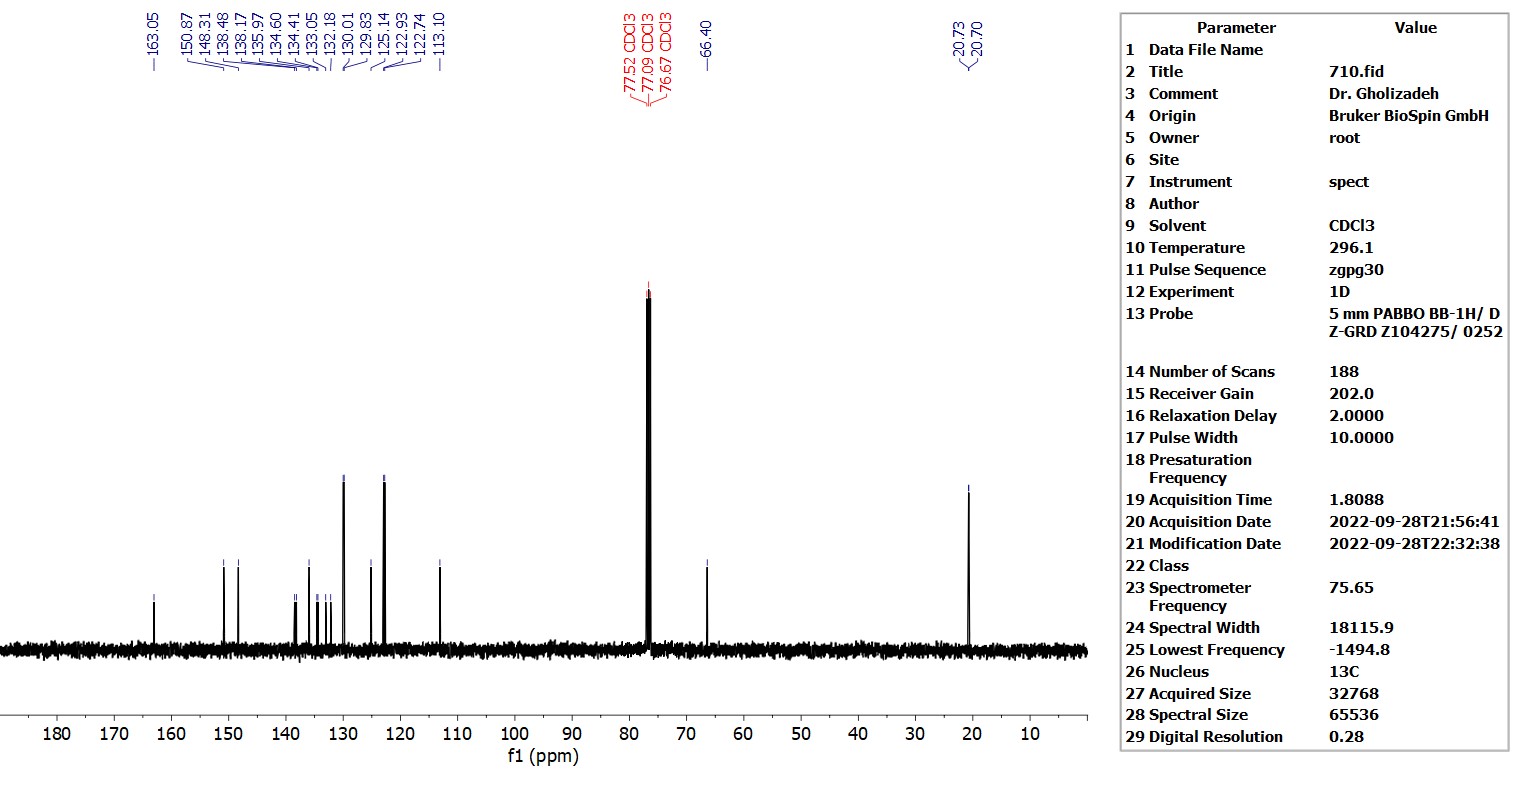


Figure 9-13C NMR (75 MHz, CDCl3) of compound (1b)


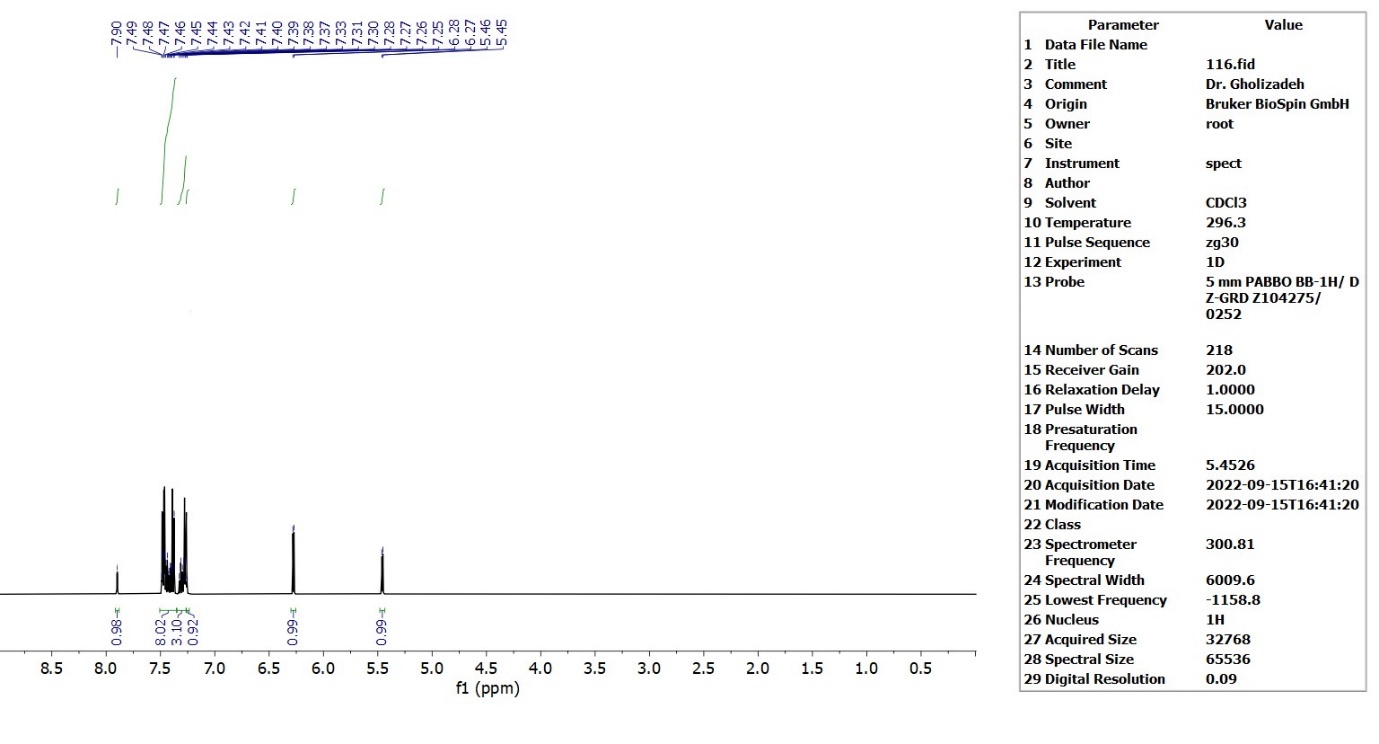


Figure 10-1H NMR (300 MHz, CDCl3) of compound (1c)


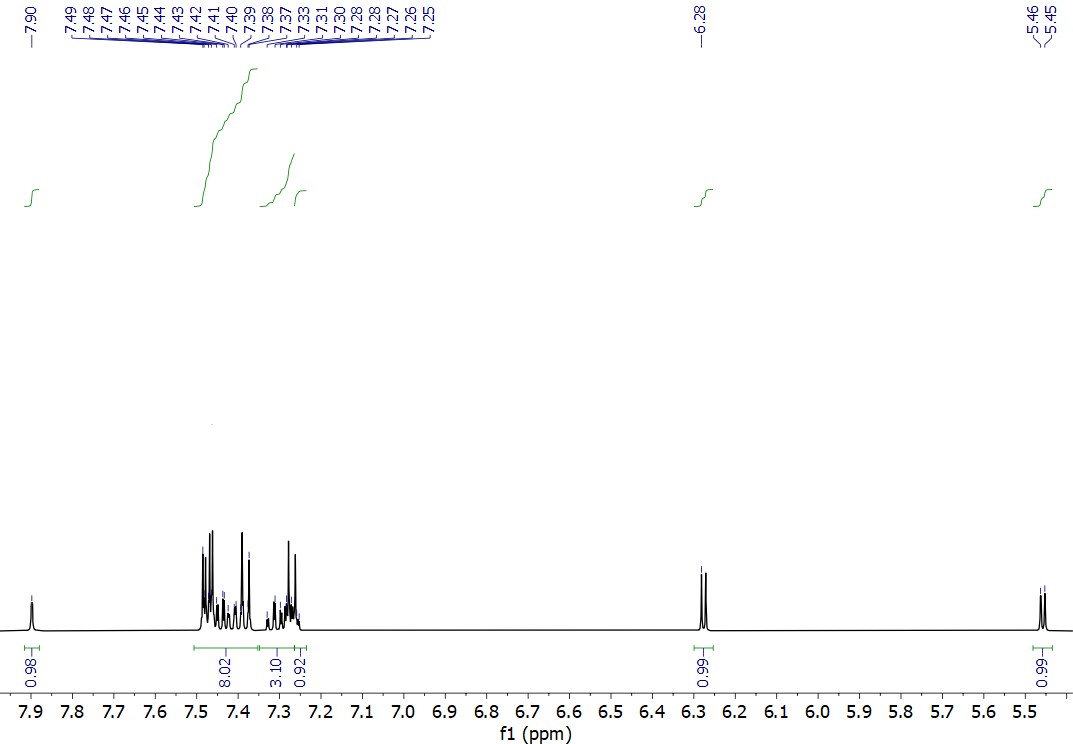


Figure 11-1H NMR expand (300 MHz, CDCl3) compound (1c)


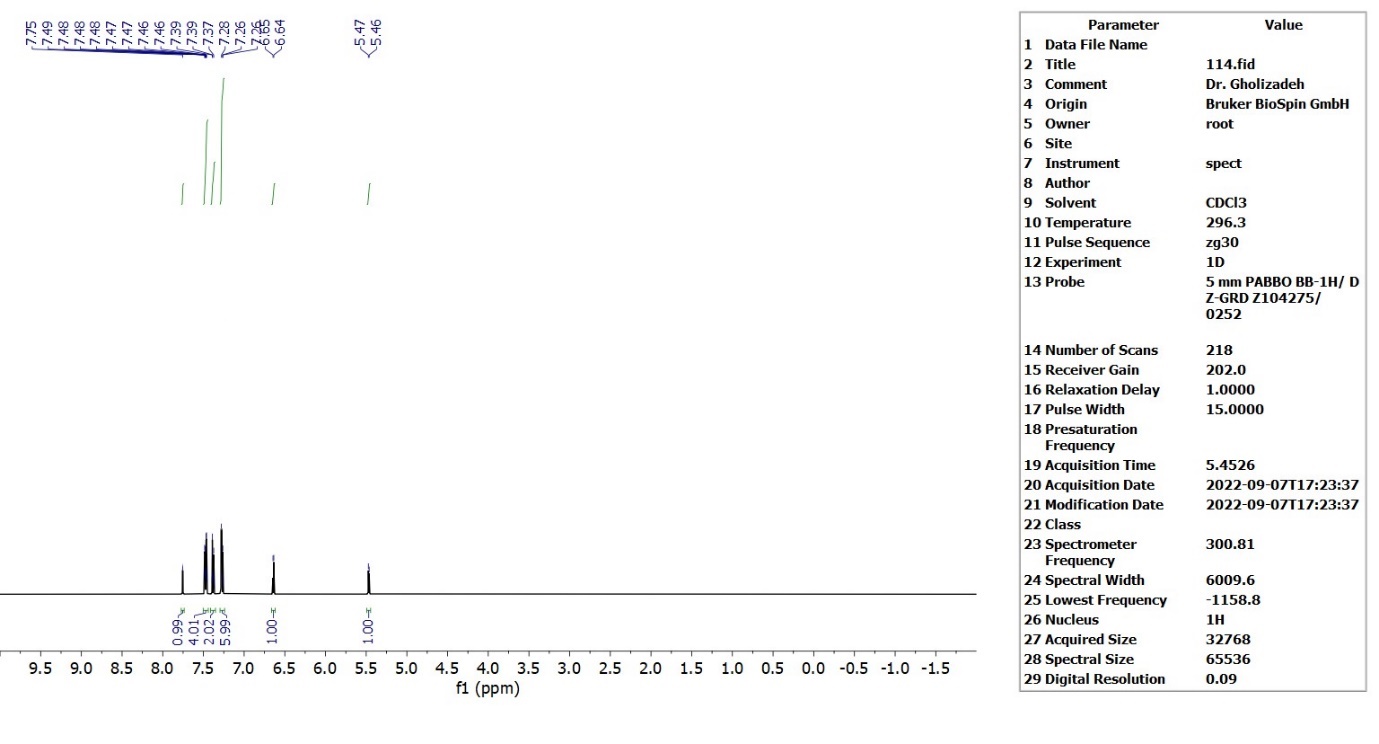

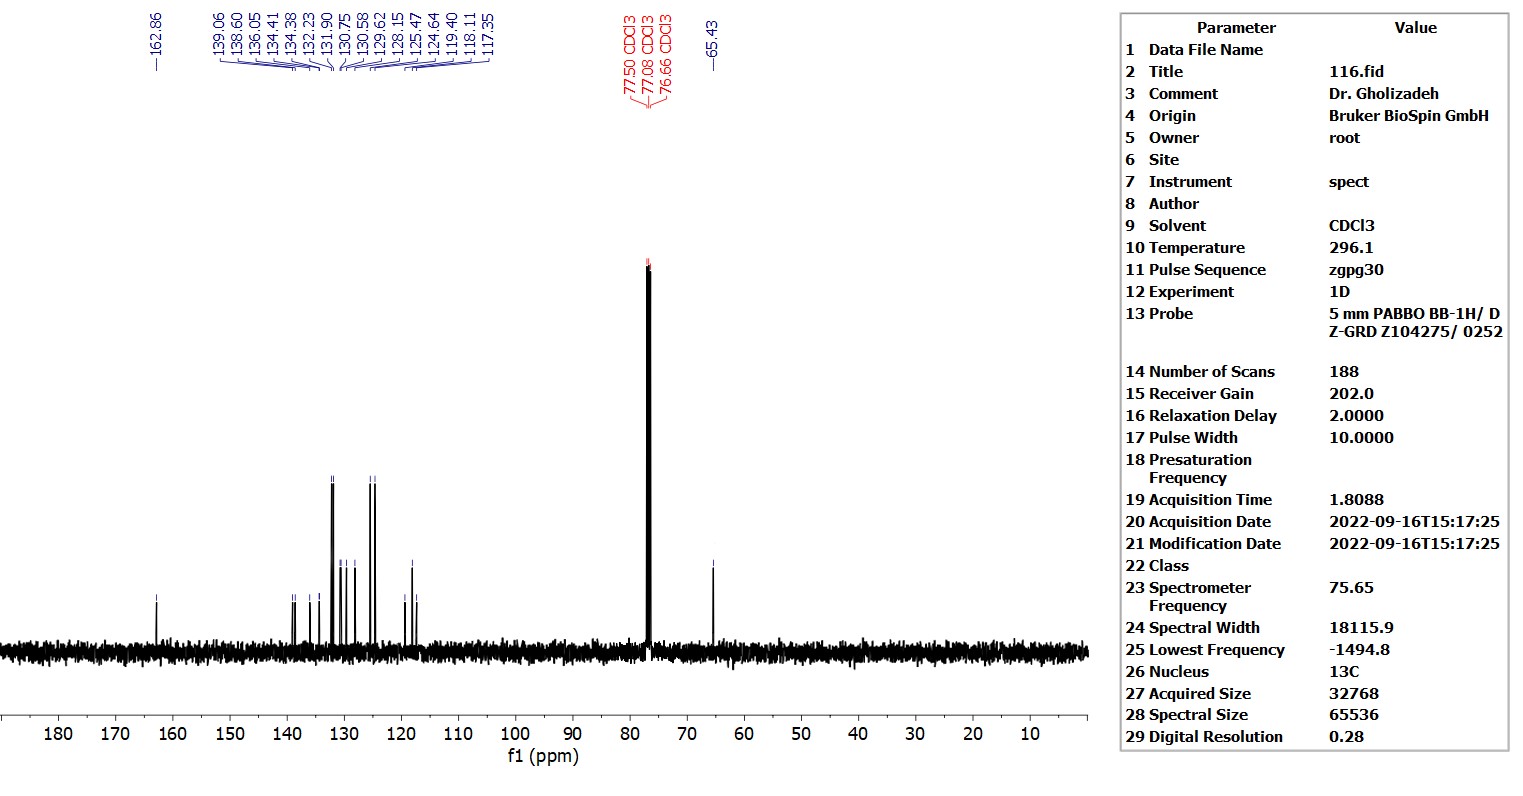


Figure 12-13C NMR (75 MHz, CDCl3) of compound (1c)

Figure 13-1H NMR (300 MHz, CDCl3) of compound (1d)


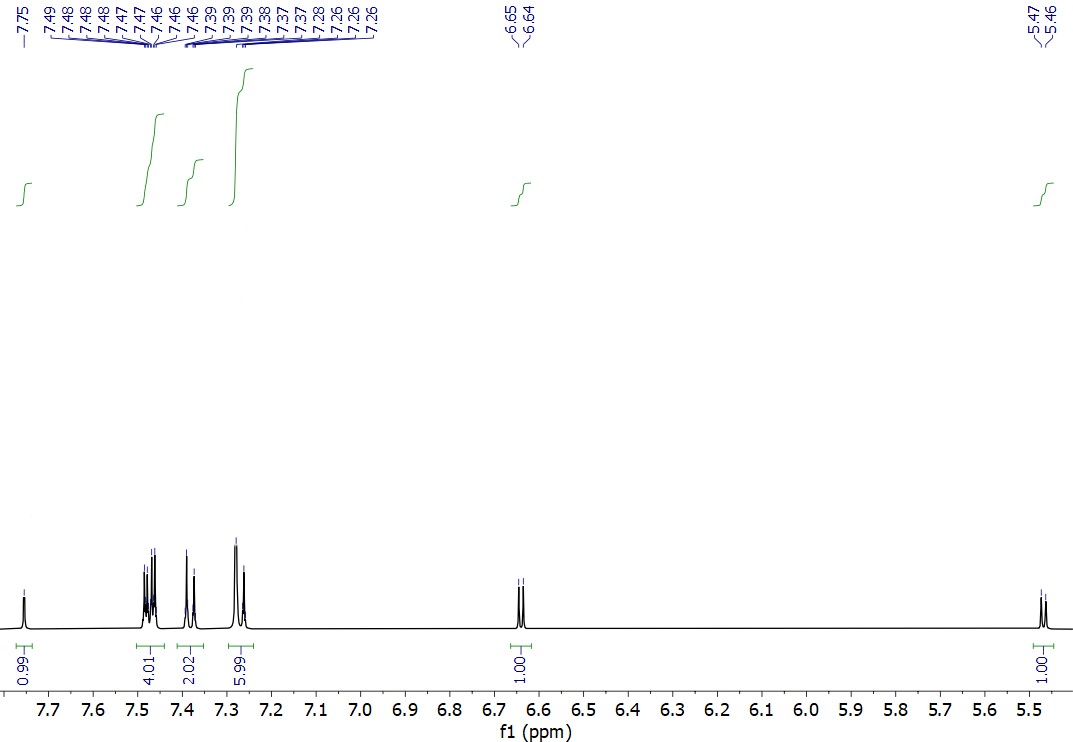


Figure 14-1H NMR expand (300 MHz, CDCl3) compound (1d)


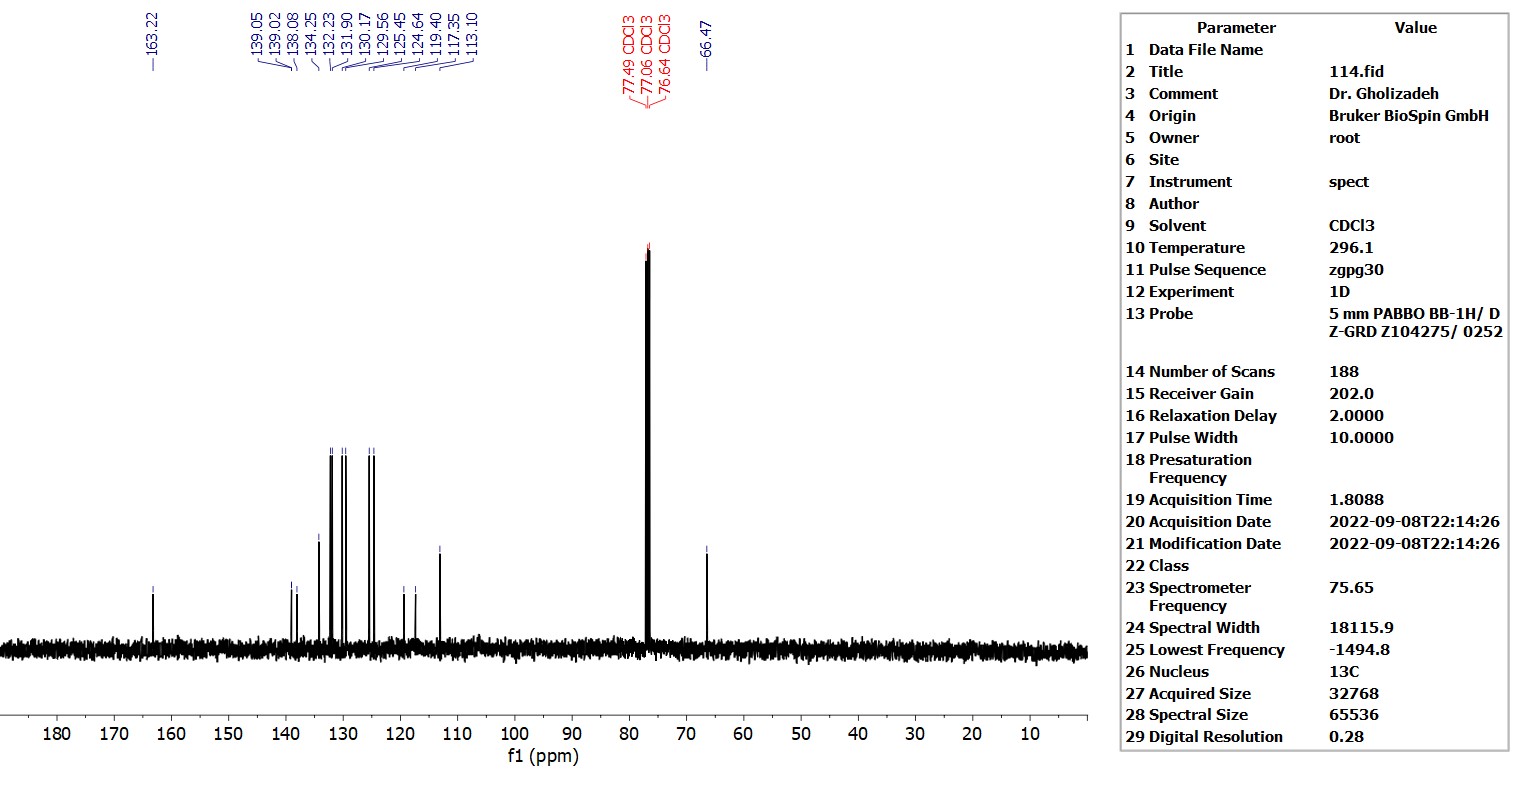


Figure 15-13C NMR (75 MHz, CDCl3) of compound (1d)


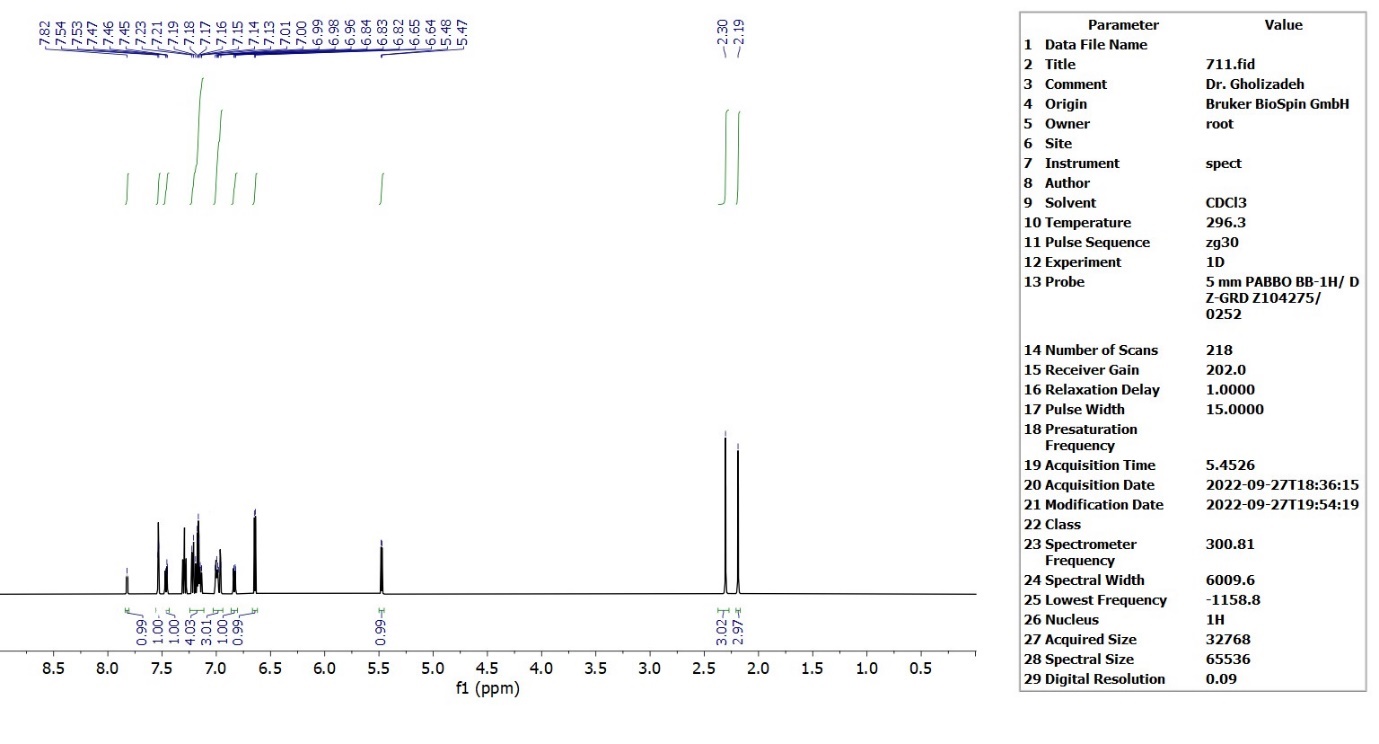


Figure 16-1H NMR (300 MHz, CDCl3) of compound (1e)


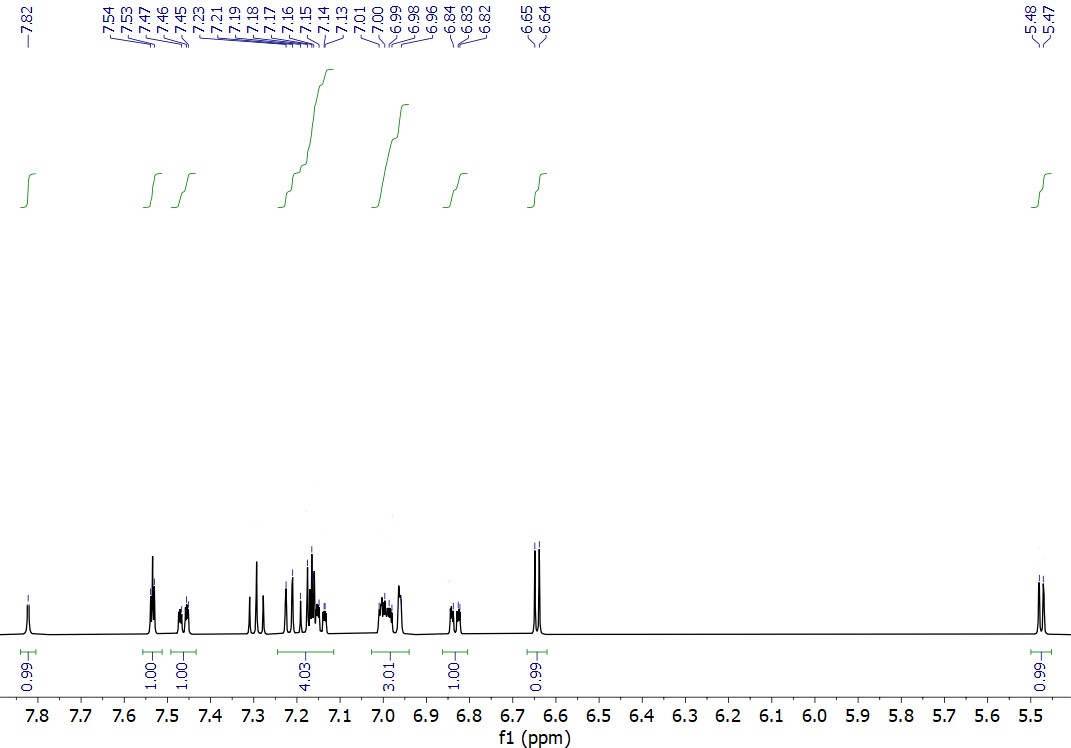


Figure 17-1H NMR expand (300 MHz, CDCl3) compound (1e)


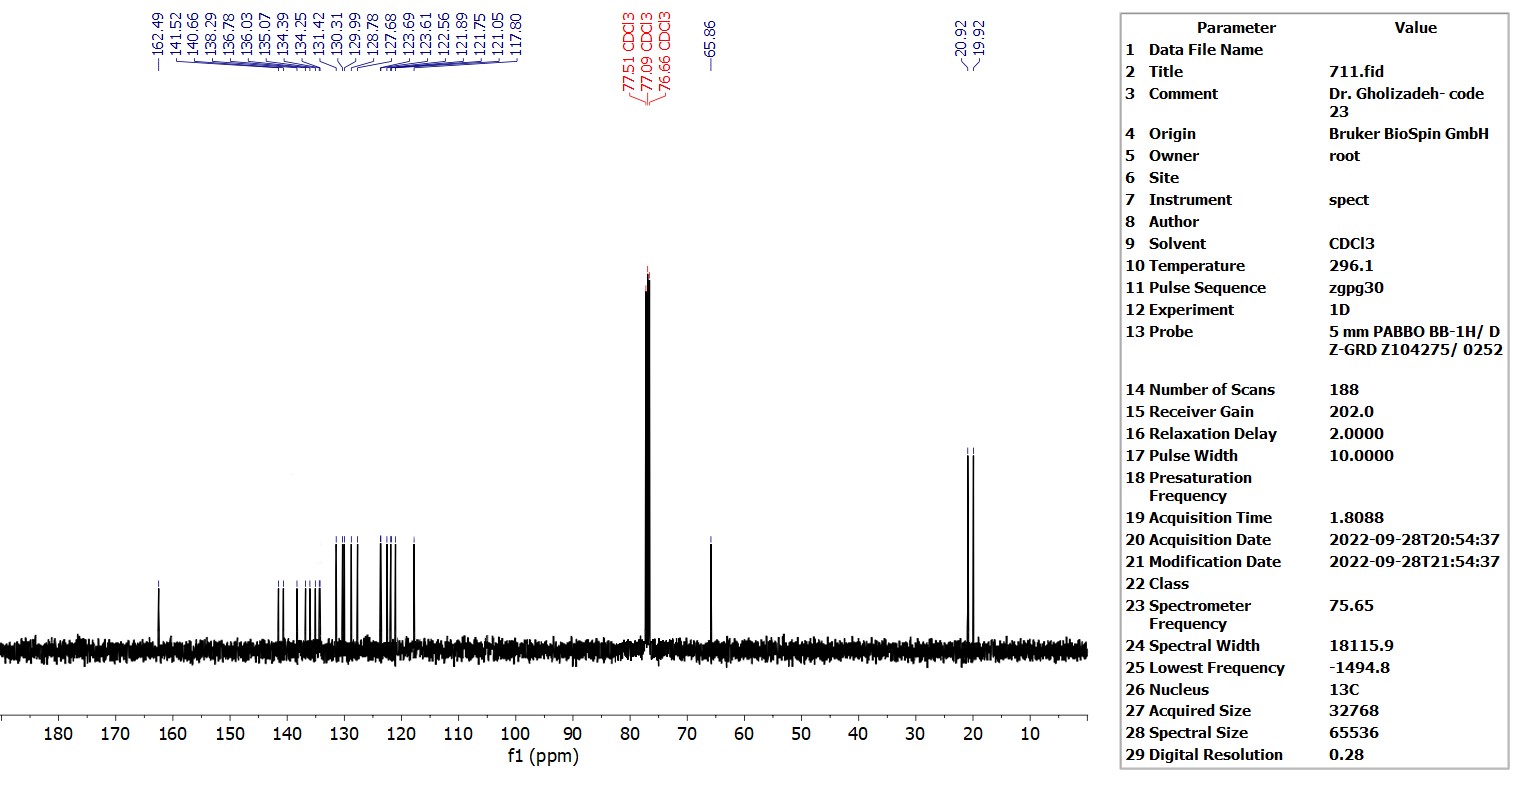


Figure 18-13C NMR (75 MHz, CDCl3) of compound (1e)


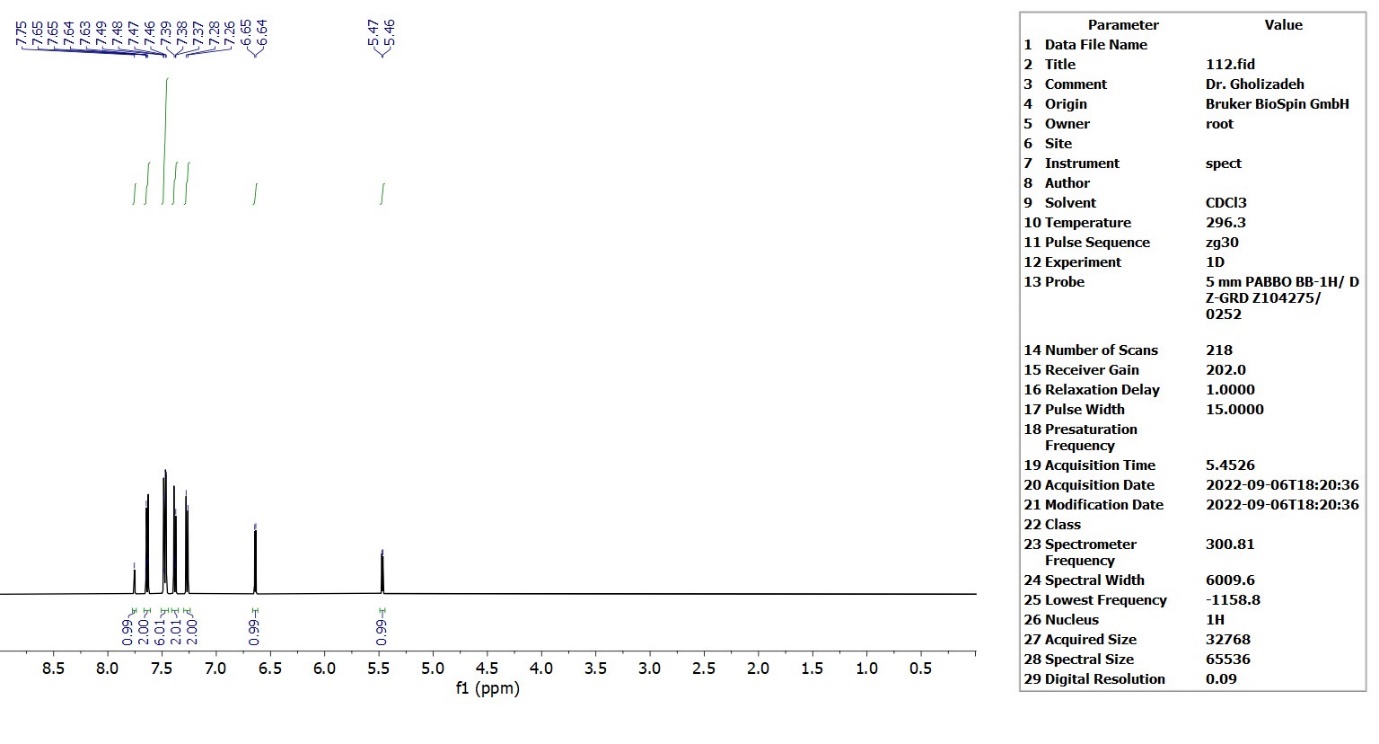


Figure 19-1H NMR (300 MHz, CDCl3) of compound (1f)


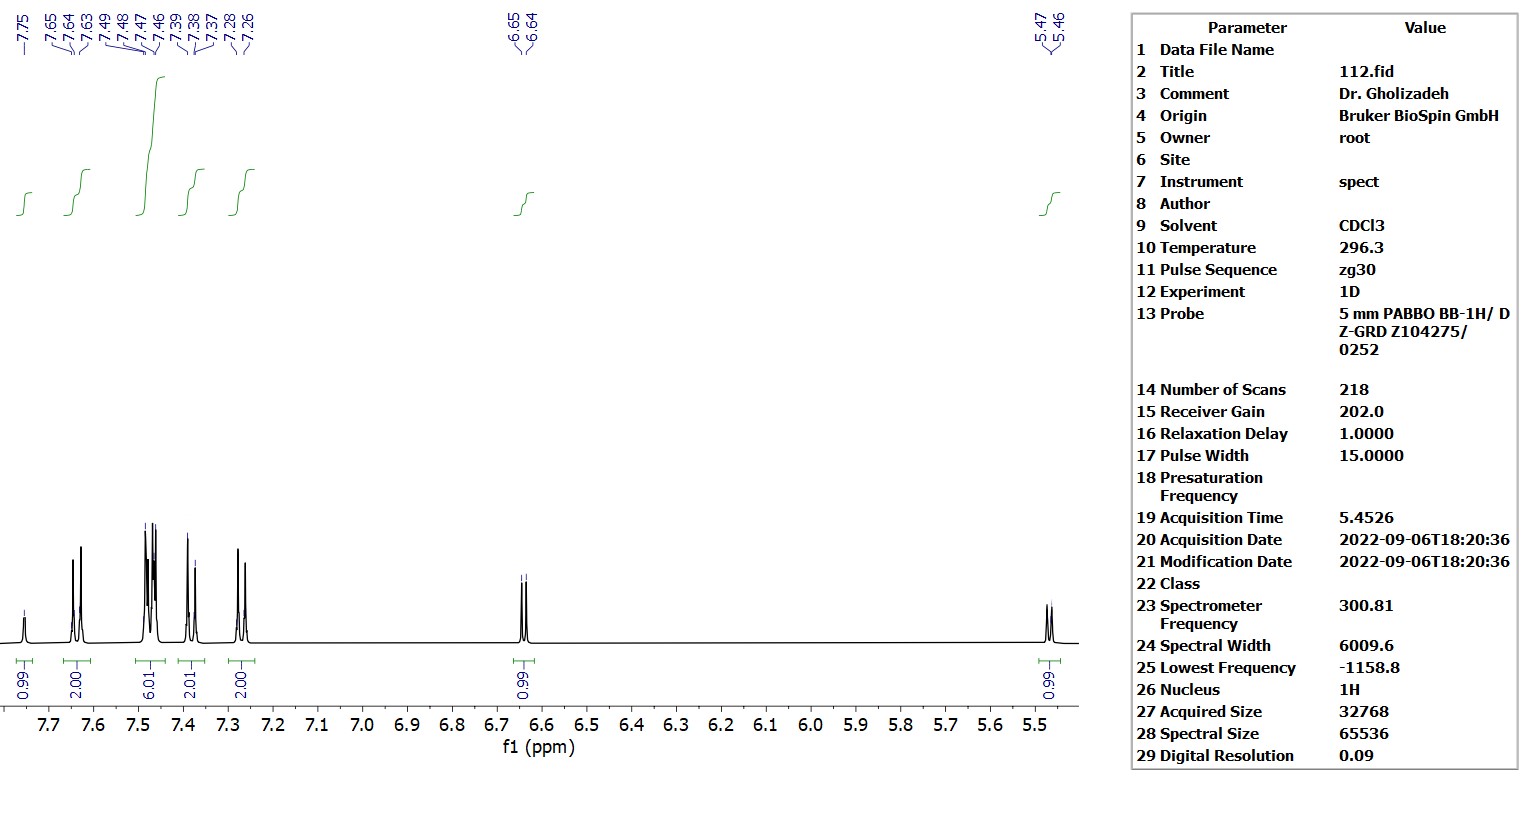


Figure 20-1H NMR expand (300 MHz, CDCl3) compound (1f)


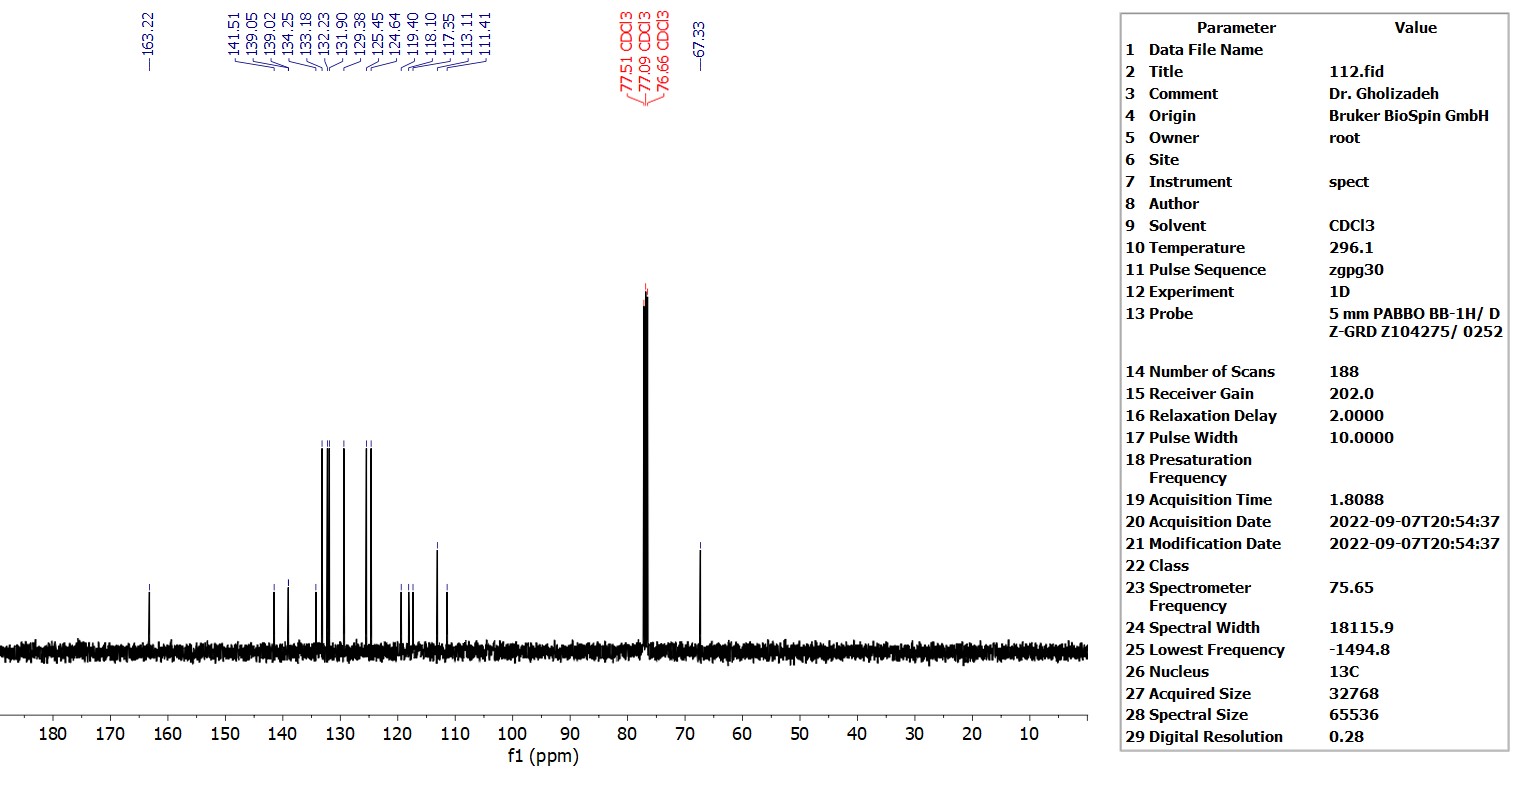


Figure 21-13C NMR (75 MHz, CDCl3) of compound (1f)


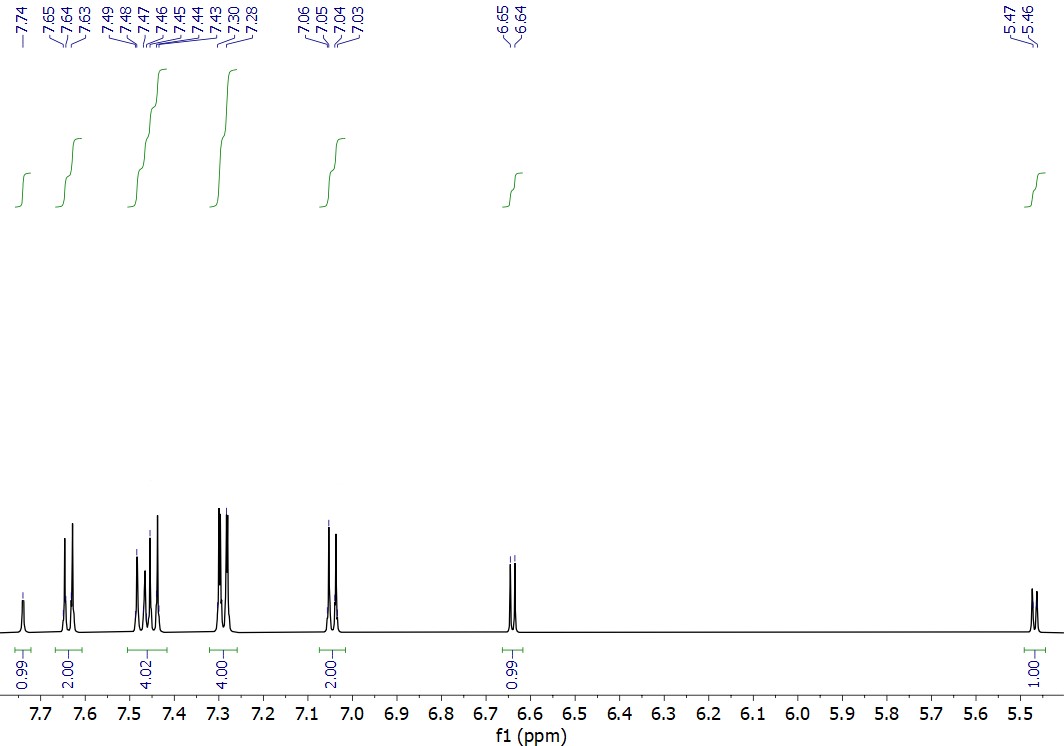


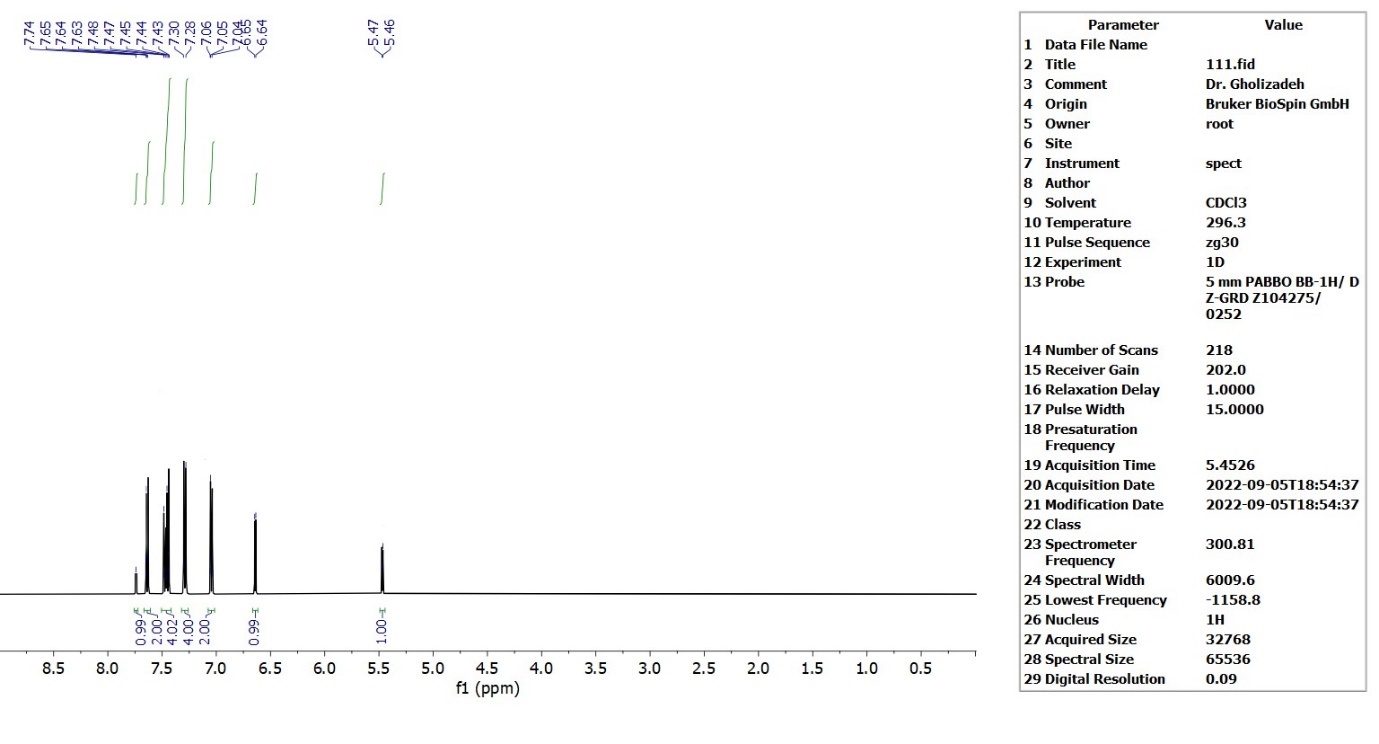


Figure 22-1H NMR (300 MHz, CDCl3) of compound (1g)

Figure 23-1H NMR expand (300 MHz, CDCl3) compound (1g)


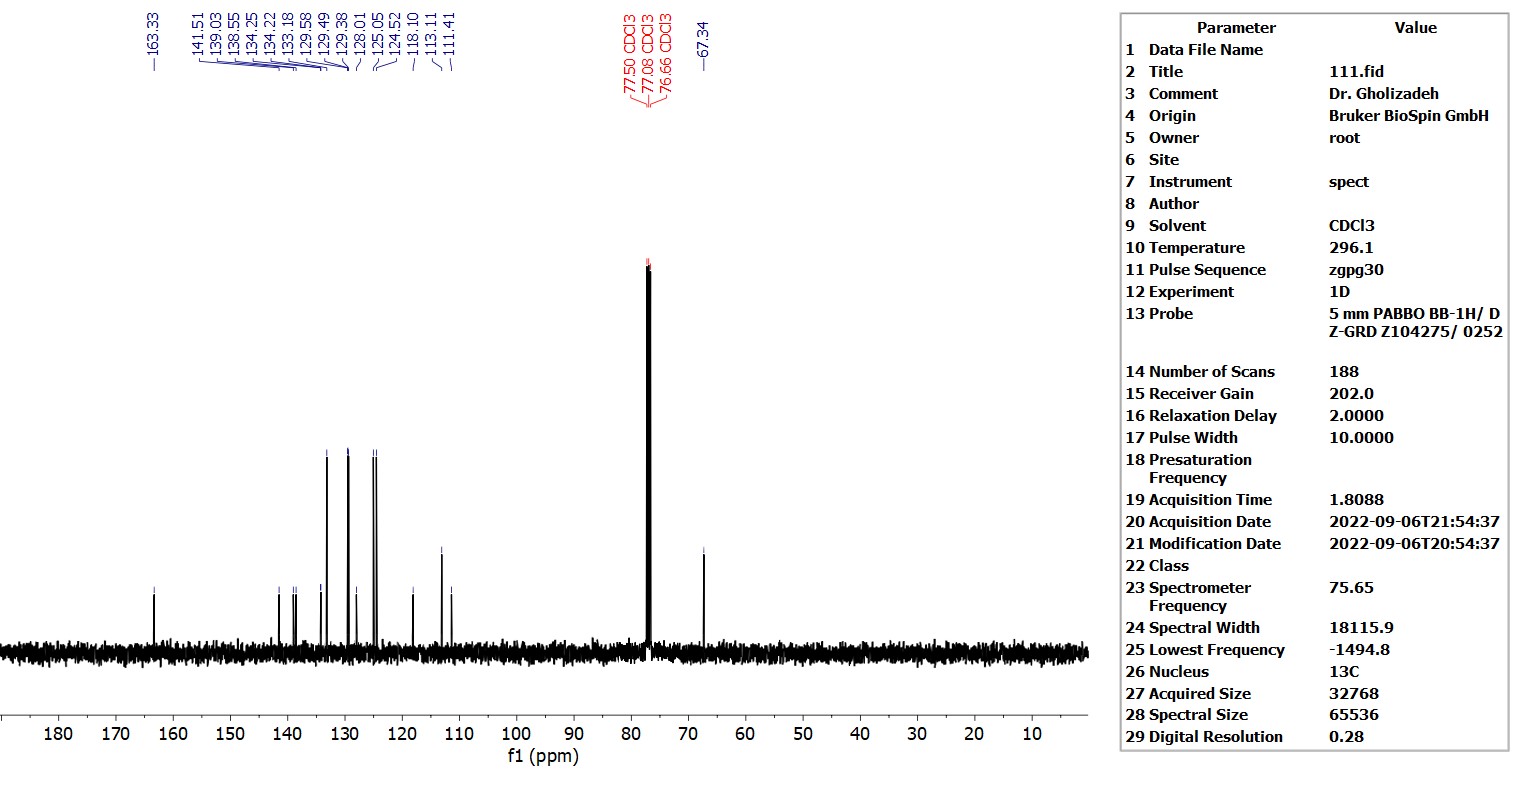


Figure 24-13C NMR (75 MHz, CDCl3) of compound (1g)


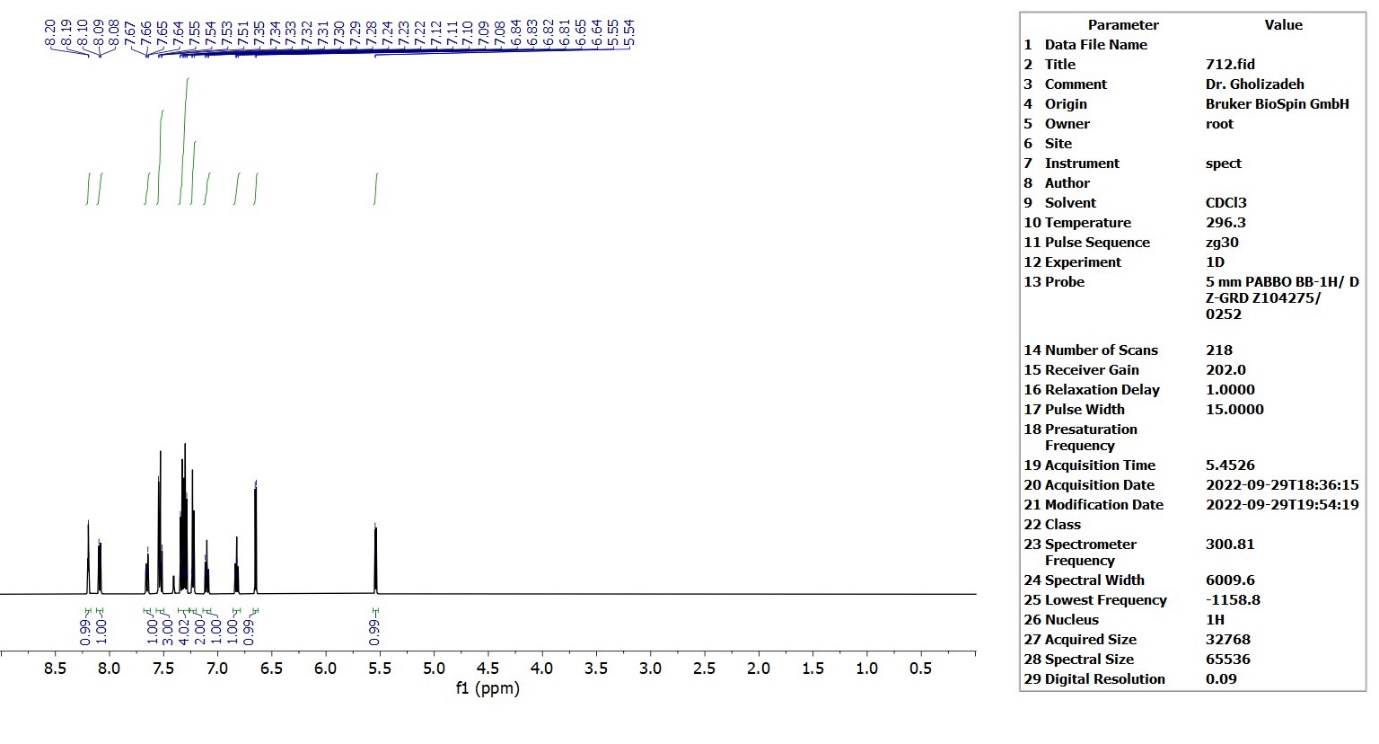


Figure 25-1H NMR (300 MHz, CDCl3) of compound (1h)


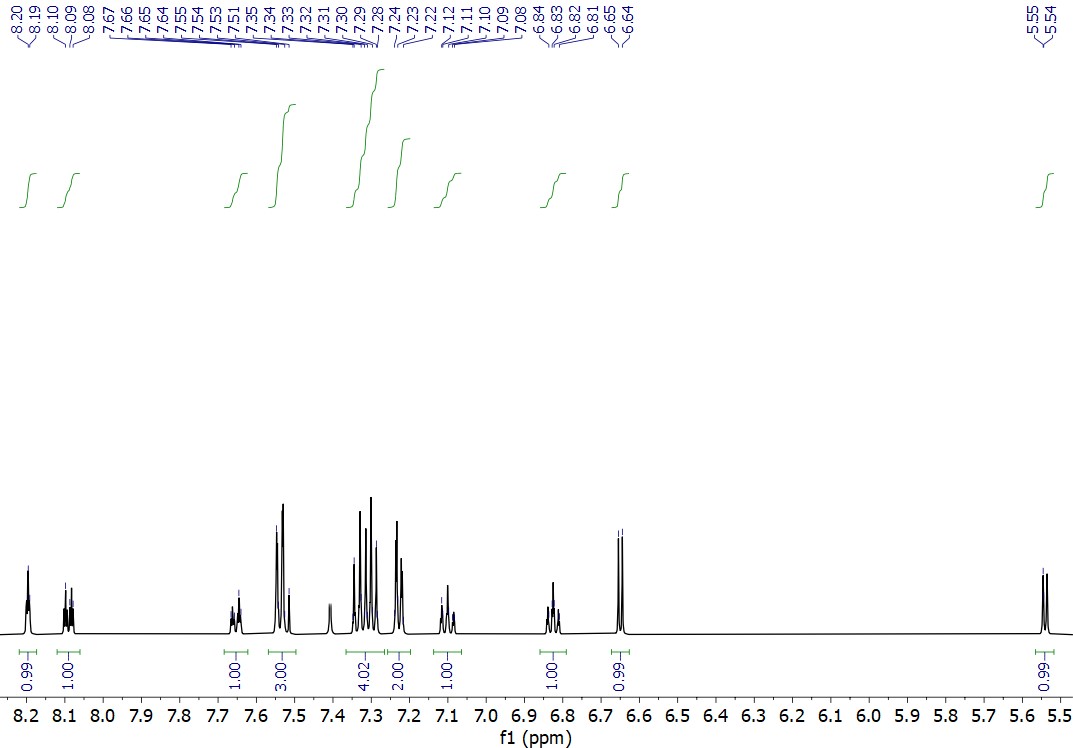


Figure 26-1H NMR expand (300 MHz, CDCl3) compound (1h)


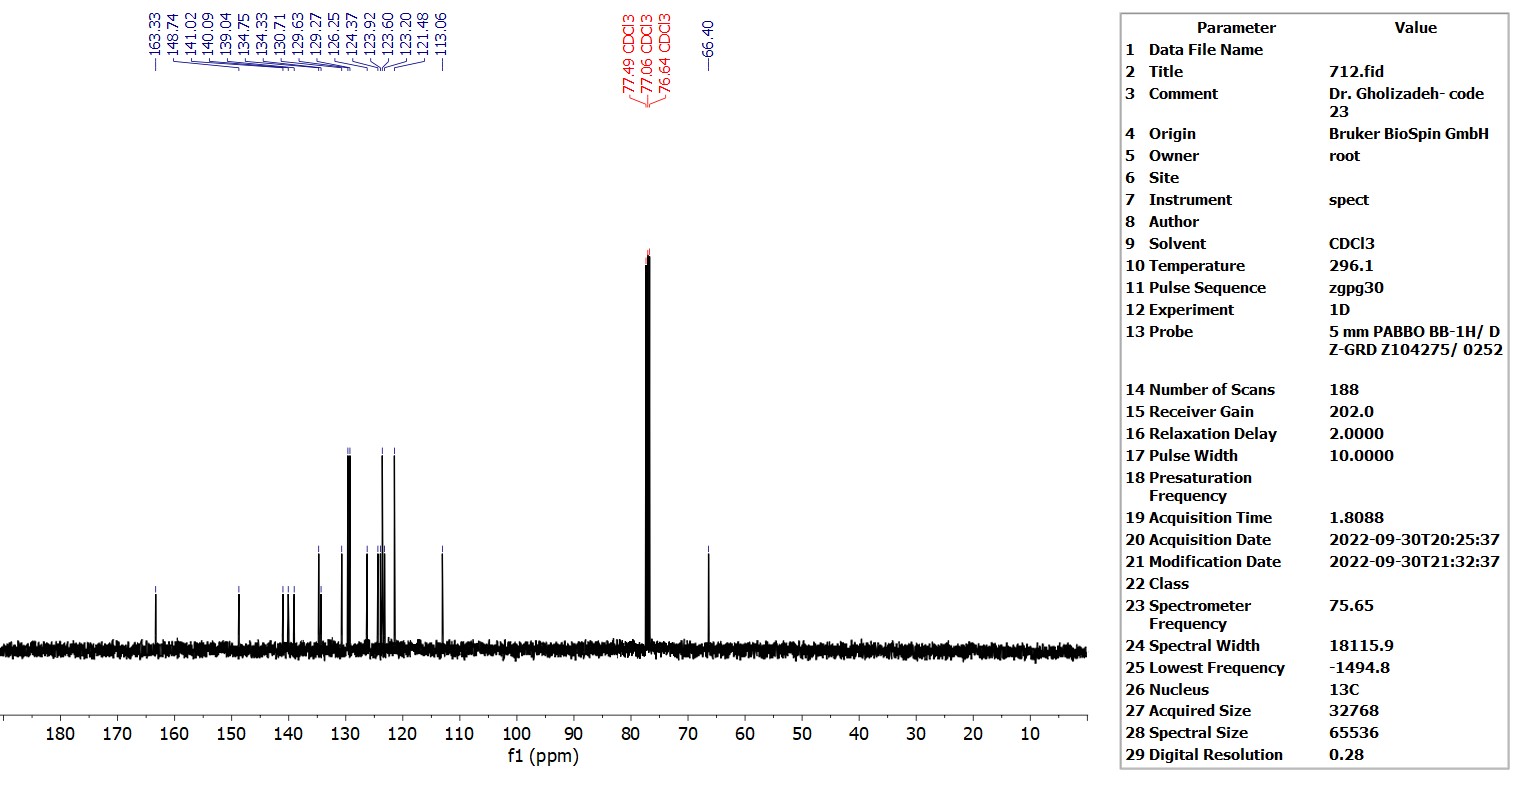


Figure 27-13C NMR (75 MHz, CDCl3) of compound (1h)


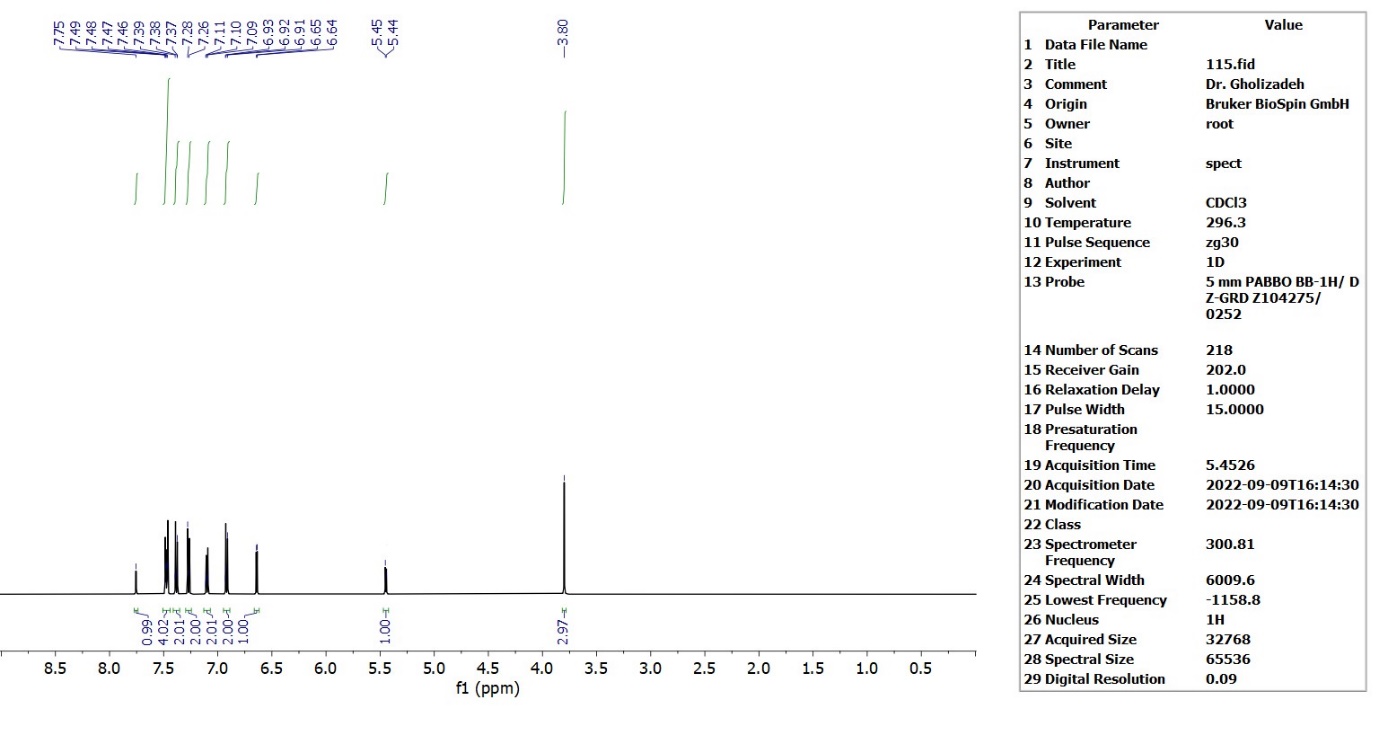


Figure 28-1H NMR (300 MHz, CDCl3) of compound (1k)


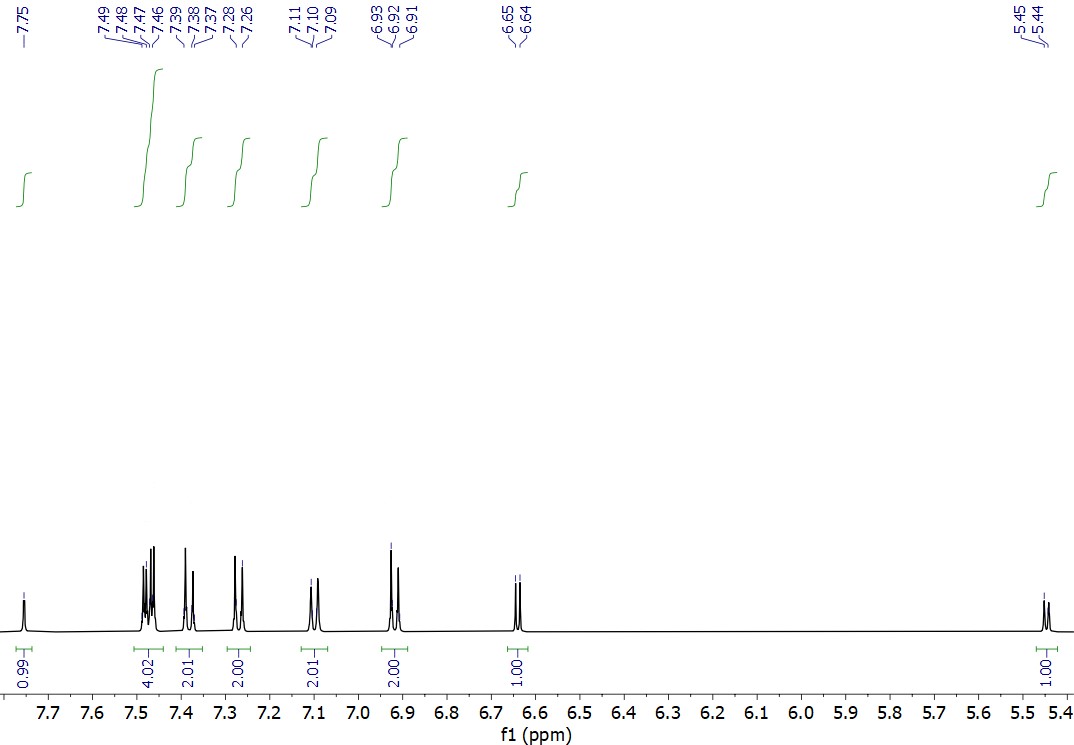


Figure 29-1H NMR expand (300 MHz, CDCl3) compound (1k)


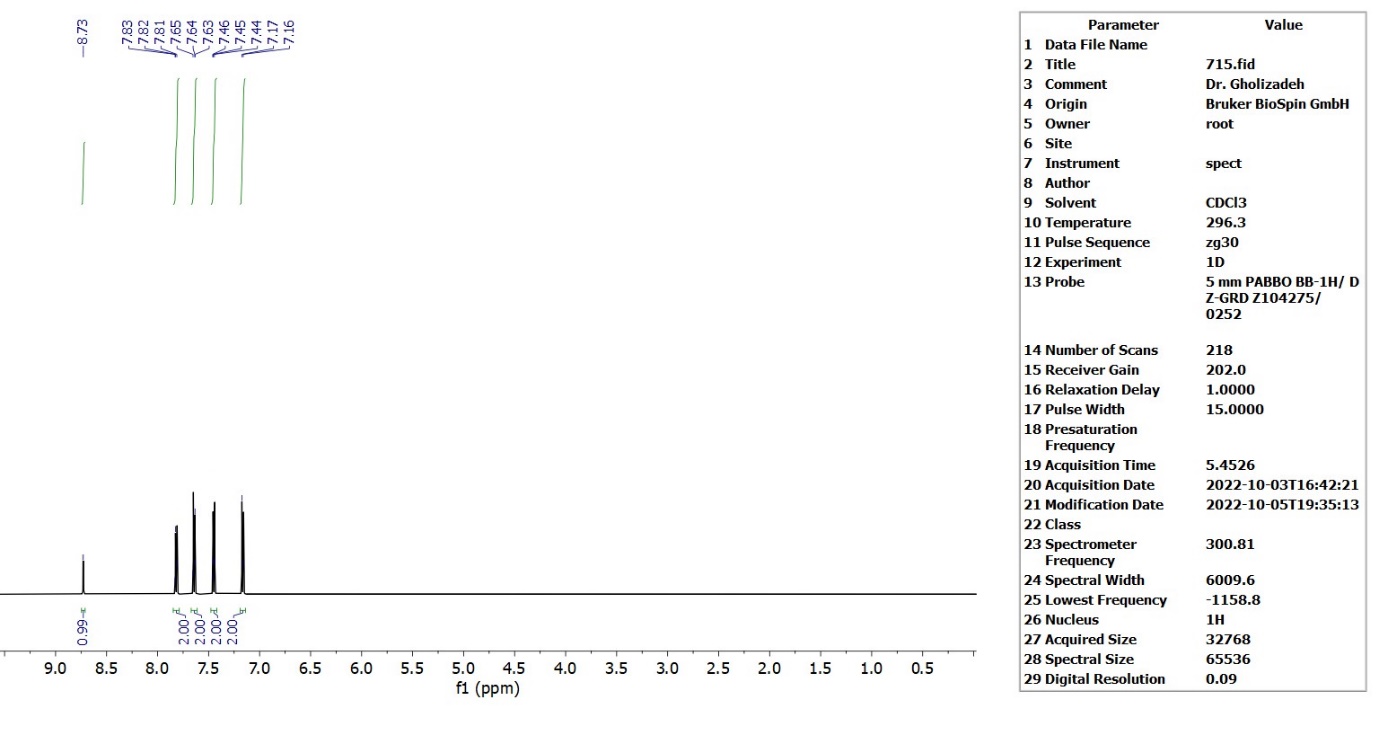

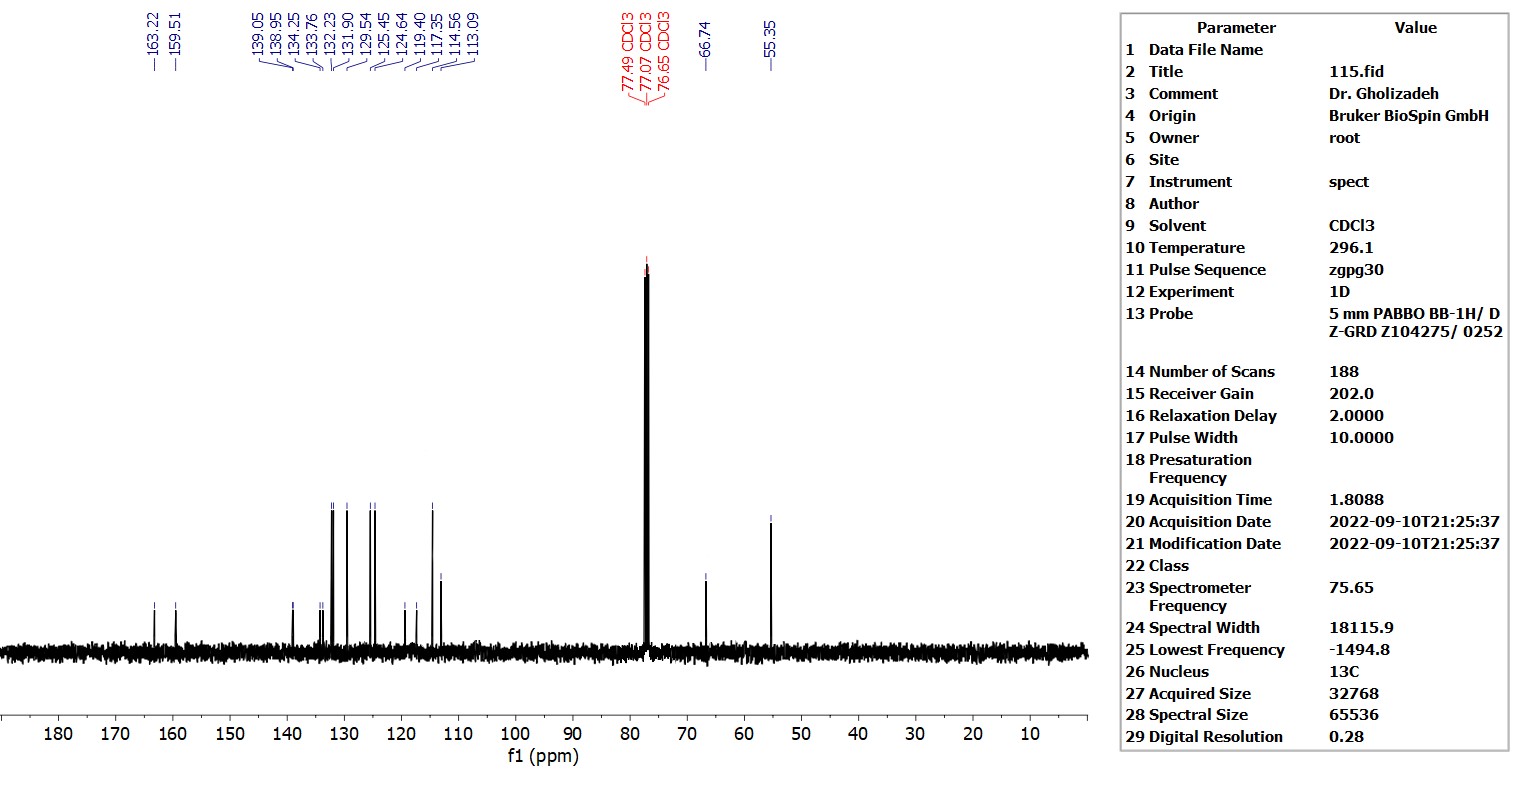


Figure 30-13C NMR (75 MHz, CDCl3) of compound (1k)

Figure 31-1H NMR (300.13 MHz, CDCl3) intermediate C


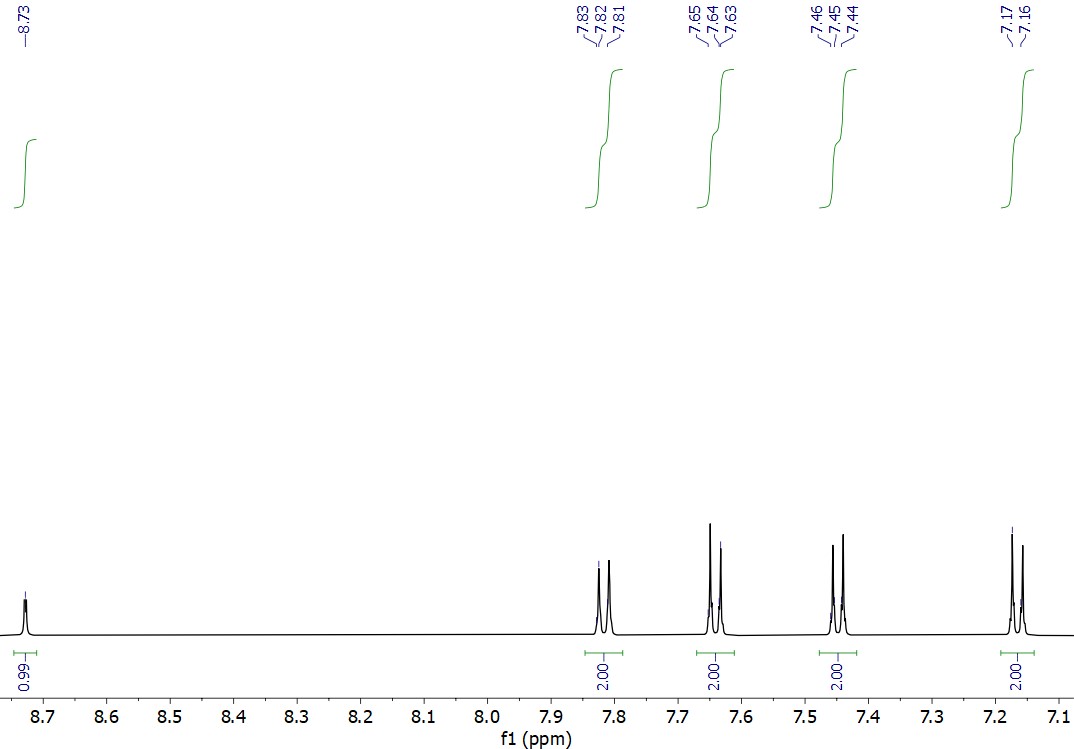


Figure 32-1H NMR expand (300.13 MHz, CDCl3) intermediate C

Figure 33-13C NMR (75 MHz, CDCl3) intermediate C


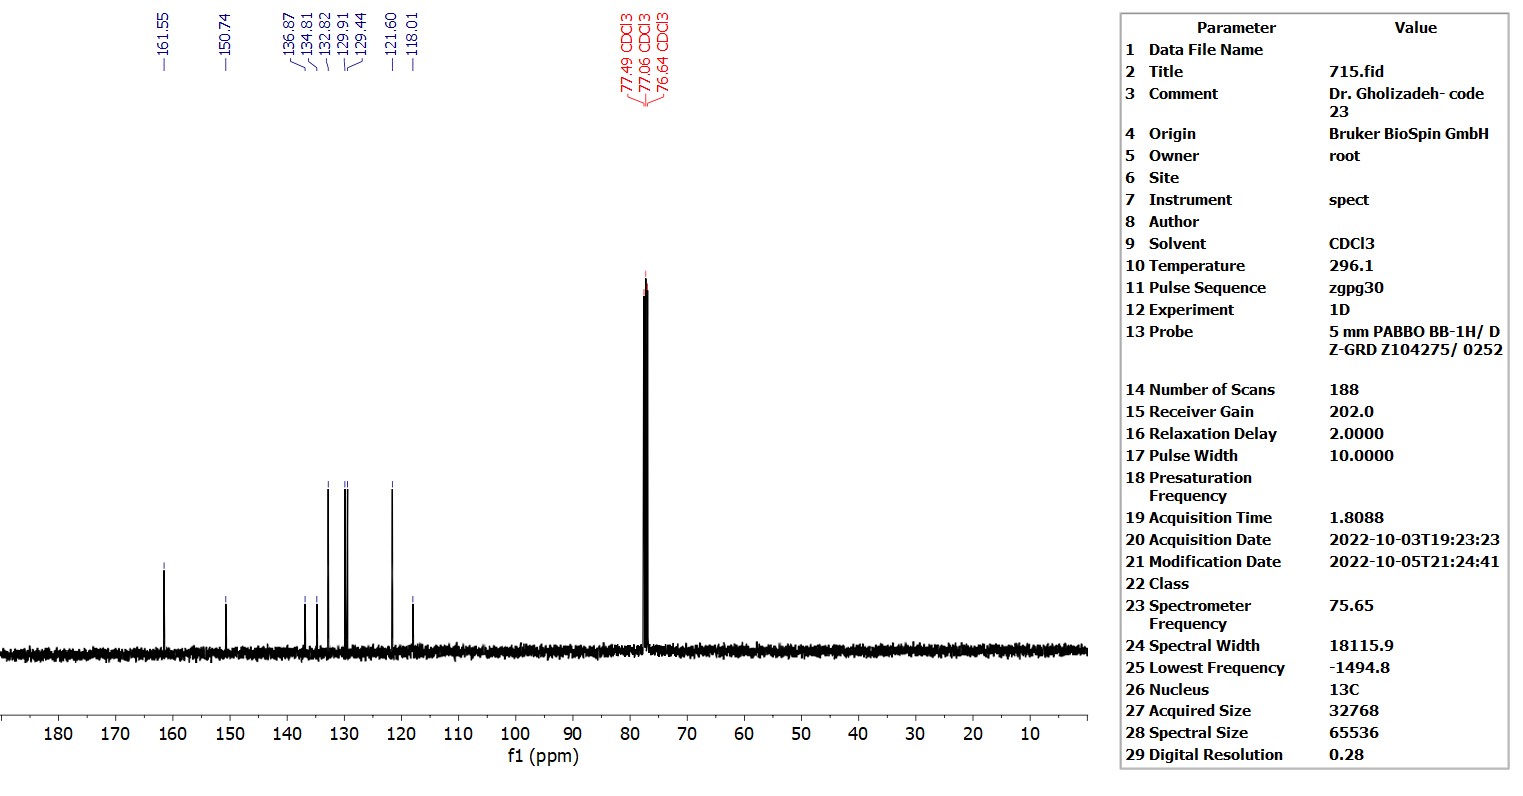


References

[1] K. Niknam and S. Mojikhalifeh, Mol Divers **18**, 111 (2014).

[2] H. R. Shaterian and M. Ranjbar, Research on Chemical Intermediates **40**, 2059 (2014).

[3] Y. Wu, L. Liu, D. Wang, and Y. Chen, J Heterocycl Chem **43**, 949 (2006).

[4] H. Younesi, S. Asghari, G. F. Pasha, and M. Tajbakhsh, Appl Organomet Chem **37**, (2023).
